# Supplementary material
Source: PubMed Central journal article supplement (PMC5193102)
Supplement: NIHMS835065-supplement-Supporting_Information.pdf [file NIHMS835065-supplement-Supporting_Information.pdf]

**Supplementary Information for:**

**Elucidation of gibberellin biosynthesis in  
bacteria reveals convergent evolution**

Ryan S. Nett<sup>1</sup>, Mariana Montano<sup>2</sup>, Ariana Marcassa<sup>4</sup>, Xuan Lu<sup>1</sup>, Raimund Nagel<sup>1</sup>, Trevor C. Charles<sup>4</sup>,  
Peter Hedden<sup>3</sup>, Maria Cecilia Rojas<sup>2</sup>, Reuben J. Peters<sup>1\*</sup>

<sup>1</sup>*Roy J. Carver Department of Biochemistry, Biophysics, and Molecular Biology, Iowa State University,  
Ames, IA 50011, USA*

<sup>2</sup>*Laboratorio de Bioorgánica, Departamento de Química, Facultad de Ciencias, Universidad de Chile,  
Casilla 653, Santiago, Chile*

<sup>3</sup>*Rothamsted Research, Harpenden, Herts AL5 2JQ, United Kingdom*

<sup>4</sup>*Department of Biology, University of Waterloo, Waterloo, Ontario N2L 3G1, Canada*

*\*Corresponding author. E-mail: rjpeters@iastate.edu*

## Supplementary Results – Table of Contents

|                                                                                                                                                                                                                                                                   | Page  |
|-------------------------------------------------------------------------------------------------------------------------------------------------------------------------------------------------------------------------------------------------------------------|-------|
| <b>Supplementary Figure 1.</b> Numbering system and ring identification for diterpenoids/gibberellins.                                                                                                                                                            | 3     |
| <b>Supplementary Figure 2.</b> GA biosynthesis in plants, fungi, and bacteria.                                                                                                                                                                                    | 4     |
| <b>Supplementary Figure 3.</b> Summary of GA biosynthesis reactions detected in <i>Bradyrhizobium japonicum</i> and <i>Sinorhizobium fredii</i> knockout bacteroid incubations.                                                                                   | 5     |
| <b>Supplementary Figure 4.</b> Mass spectra of putative <i>ent</i> -kaurenol ( <b>2</b> ), <i>ent</i> -kaurenal ( <b>3</b> ), and <i>ent</i> -kaurenoic acid ( <b>4</b> ) from CYP117 incubations.                                                                | 6     |
| <b>Supplementary Figure 5.</b> Trace amounts of <i>ent</i> -kaurenol ( <b>2</b> ) and <i>ent</i> -kaurenal ( <b>3</b> ) are produced from incubation of <i>ent</i> -kaurene ( <b>1</b> ) with CYP117.                                                             | 7     |
| <b>Supplementary Figure 6.</b> Mass spectra of putative <i>ent</i> -7 $\alpha$ -hydroxykaurenoic acid ( <b>5</b> ) and GA <sub>12</sub> -aldehyde ( <b>6</b> ) detected in CYP114 (+/- Fd <sub>GA</sub> ) incubations.                                            | 8     |
| <b>Supplementary Figure 7.</b> CYP114-Fd <sub>GA</sub> can oxidize GA <sub>12</sub> -aldehyde ( <b>6</b> ) to GA <sub>12</sub> ( <b>7</b> ) at low efficiency.                                                                                                    | 9     |
| <b>Supplementary Figure 8.</b> <i>ent</i> -7 $\alpha$ -hydroxykaurenoic acid ( <b>5</b> ) is sufficiently transported into <i>S. meliloti</i> cells heterologously expressing CYP114-Fd <sub>GA</sub> .                                                           | 10    |
| <b>Supplementary Figure 9.</b> Molecular modeling supports the role of a C-19 carboxylate in ring contraction and $\gamma$ -lactone formation.                                                                                                                    | 11    |
| <b>Supplementary Figure 10.</b> Mass spectra of putative GA <sub>12</sub> ( <b>7</b> ) from SfSDR <sub>GA</sub> and BjSDR <sub>GA</sub> incubations.                                                                                                              | 12    |
| <b>Supplementary Figure 11.</b> SDR <sub>GA</sub> from <i>Bradyrhizobium japonicum</i> oxidizes GA <sub>12</sub> -aldehyde ( <b>6</b> ) to GA <sub>12</sub> ( <b>7</b> ).                                                                                         | 13    |
| <b>Supplementary Figure 12.</b> Mass spectra of putative GA <sub>15</sub> ( <b>8</b> ), GA <sub>24</sub> ( <b>9</b> ), and GA <sub>9</sub> ( <b>10</b> ) from CYP112 incubations.                                                                                 | 14    |
| <b>Supplementary Table 1.</b> Products (methyl esters and TMS-ethers) identified by GC-MS from incubations of <sup>14</sup> C-labeled and unlabeled GA precursors with bacteroids of <i>B. japonicum</i> CYP knock-out mutants.                                   | 15-18 |
| <b>Supplementary Table 2.</b> Products (methyl esters and TMS-ethers) identified by GC-MS from incubations of <sup>14</sup> C-labeled GA precursors with bacteroids of <i>S. fredii</i> CYP knock-out mutants.                                                    | 19-21 |
| <b>Supplementary Table 3.</b> Products (methyl esters and TMS-ethers) identified by GC-MS from incubations of <sup>14</sup> C-labeled and unlabeled GA precursors with bacteroids of <i>B. japonicum</i> SDR <sub>GA</sub> or Fd <sub>GA</sub> knock-out mutants. | 22-29 |
| <b>Supplementary Table 4.</b> Products (methyl esters and TMS-ethers) identified by GC-MS from incubations of <sup>14</sup> C-labeled and unlabeled GA precursors with bacteroids of <i>S. fredii</i> SDR <sub>GA</sub> or Fd <sub>GA</sub> knock-out mutants.    | 30-32 |
| <b>Supplementary Table 5.</b> Comprehensive examination of enzyme functionality with GA pathway intermediates.                                                                                                                                                    | 33    |
| <b>Supplementary Table 6.</b> Identity between plant, fungal, and bacterial cytochromes P450 involved in GA biosynthesis.                                                                                                                                         | 33    |
| <b>Supplementary Table 7.</b> List of prominent strains, plasmids, and constructs used in experiments.                                                                                                                                                            | 34-37 |
| <b>Supplementary Table 8.</b> Primers used to create expression constructs and deletion bacteroid strains.                                                                                                                                                        | 38-41 |
| <b>Supplementary Table 9.</b> List of genes characterized in this study.                                                                                                                                                                                          | 42    |

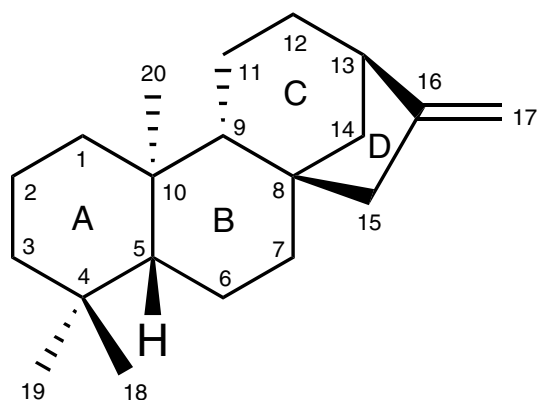

*ent*-kaurene (1)

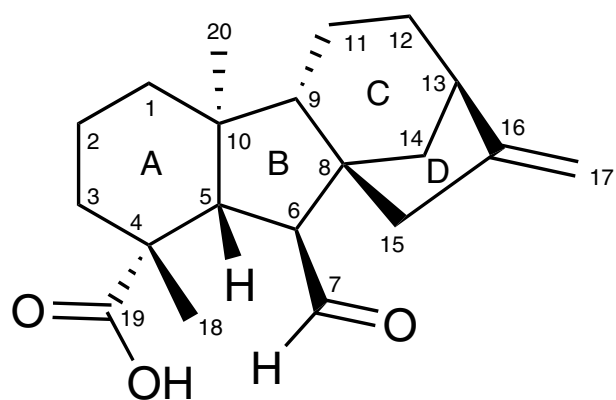

GA<sub>12</sub>-aldehyde (6)

**Supplementary Figure 1. Numbering system and ring identification for diterpenoids/gibberellins.** Shown is the carbon numbering system for a representative diterpene/diterpenoid, *ent*-kaurene (1; *ent*-kaurane backbone, 6-6-6-5), and a representative gibberellin, GA<sub>12</sub>-aldehyde (6; *ent*-gibberellane backbone, 6-5-6-5). Also shown is the nomenclature of the characteristic ring systems (A, B, C, and D). Note the changes in **6** that result from B-ring contraction and extrusion of C-7<sup>‡</sup>. (<sup>‡</sup>this is the presumed carbon that is extruded, but has not been shown for bacterial GA biosynthesis).

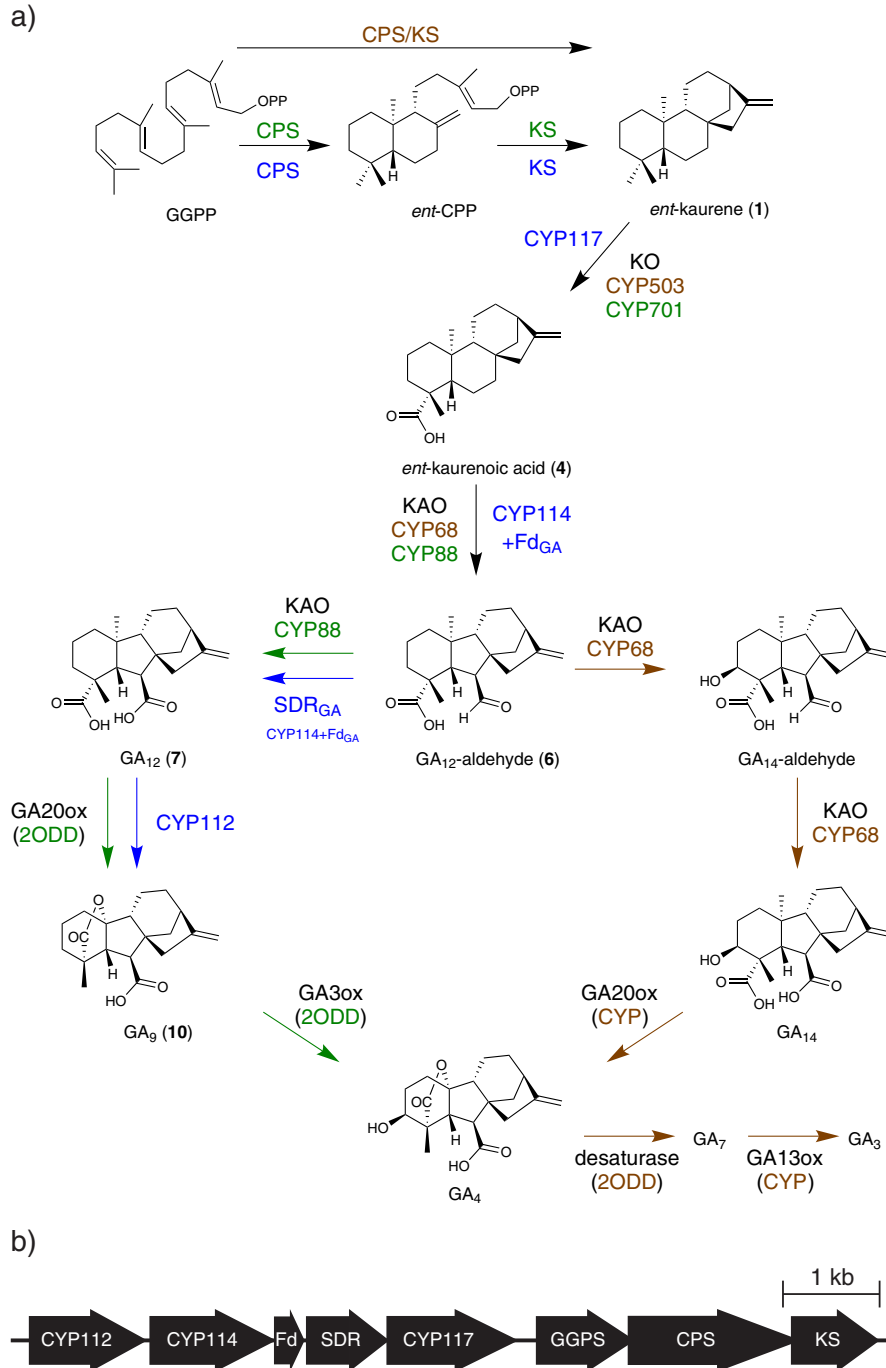

**Supplementary Figure 2. GA biosynthesis in plants, fungi, and bacteria.** a) Convergent biosynthetic pathways have evolved for GA production in plants (green), fungi (brown), and core-operon containing rhizobia (blue). Shown here are abbreviated pathways, with plants and fungi converging on GA<sub>4</sub>. Note that the 13-hydroxylation pathway for plants is not represented here. Also, while GA<sub>3</sub> is the major final product for the fungus *Gibberella fujikuroi*, other fungal species produce different bioactive GAs as their major product. GGPP=(*E,E,E*)-geranylgeranyl diphosphate; GGPS=(*E,E,E*)-geranylgeranyl diphosphate synthase; *ent*-CPP=*ent*-copalyl diphosphate; CPS=*ent*-copalyl diphosphate synthase; KS=*ent*-kaurene synthase; KO=*ent*-kaurene oxidase; KAO=*ent*-kaurenoic acid oxidase; CYP=cytochrome P450 monooxygenase; 2ODD=2-oxoglutarate dependent dioxygenase. b) GA biosynthetic operon found in *B. japonicum* and *S. fredii*. 1 kb=1 kilobase; Fd=ferredoxin; SDR=short chain dehydrogenase/reductase.

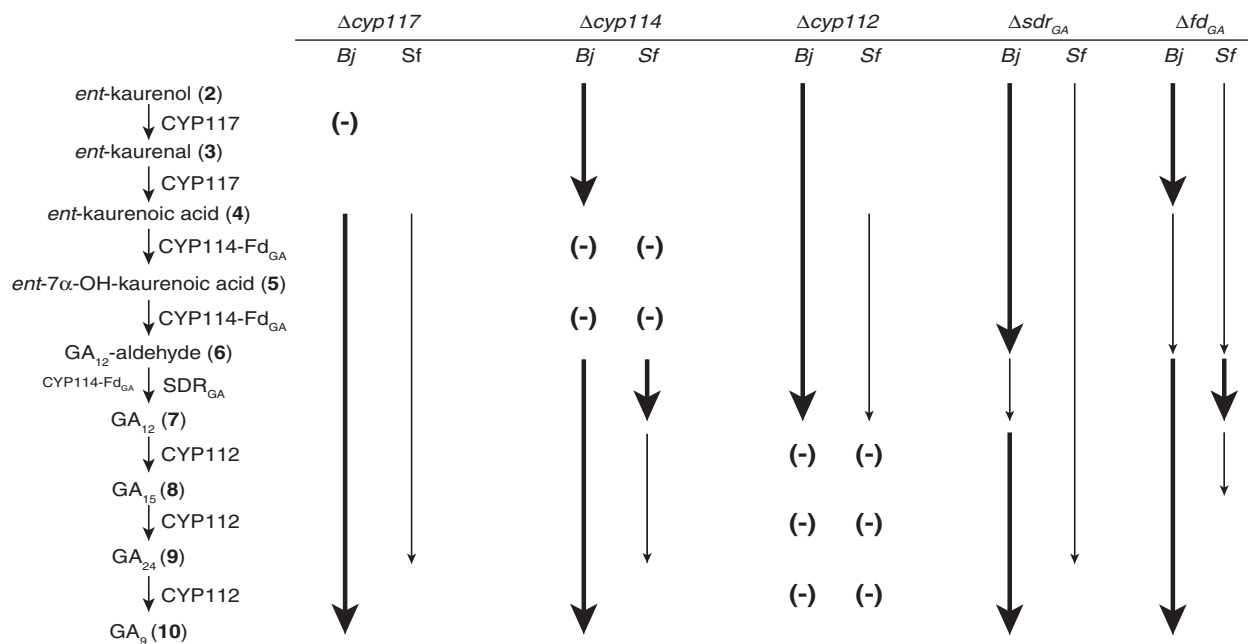

**Supplementary Figure 3. Summary of GA biosynthesis reactions detected in *Bradyrhizobium japonicum* and *Sinorhizobium fredii* knockout bacteroid incubations.** Arrows indicate observed reactions, with arrow thickness representing relative efficiency of the detected reactions. (-): reaction not detected. Note that overall substrate turnover was higher in *B. japonicum*.

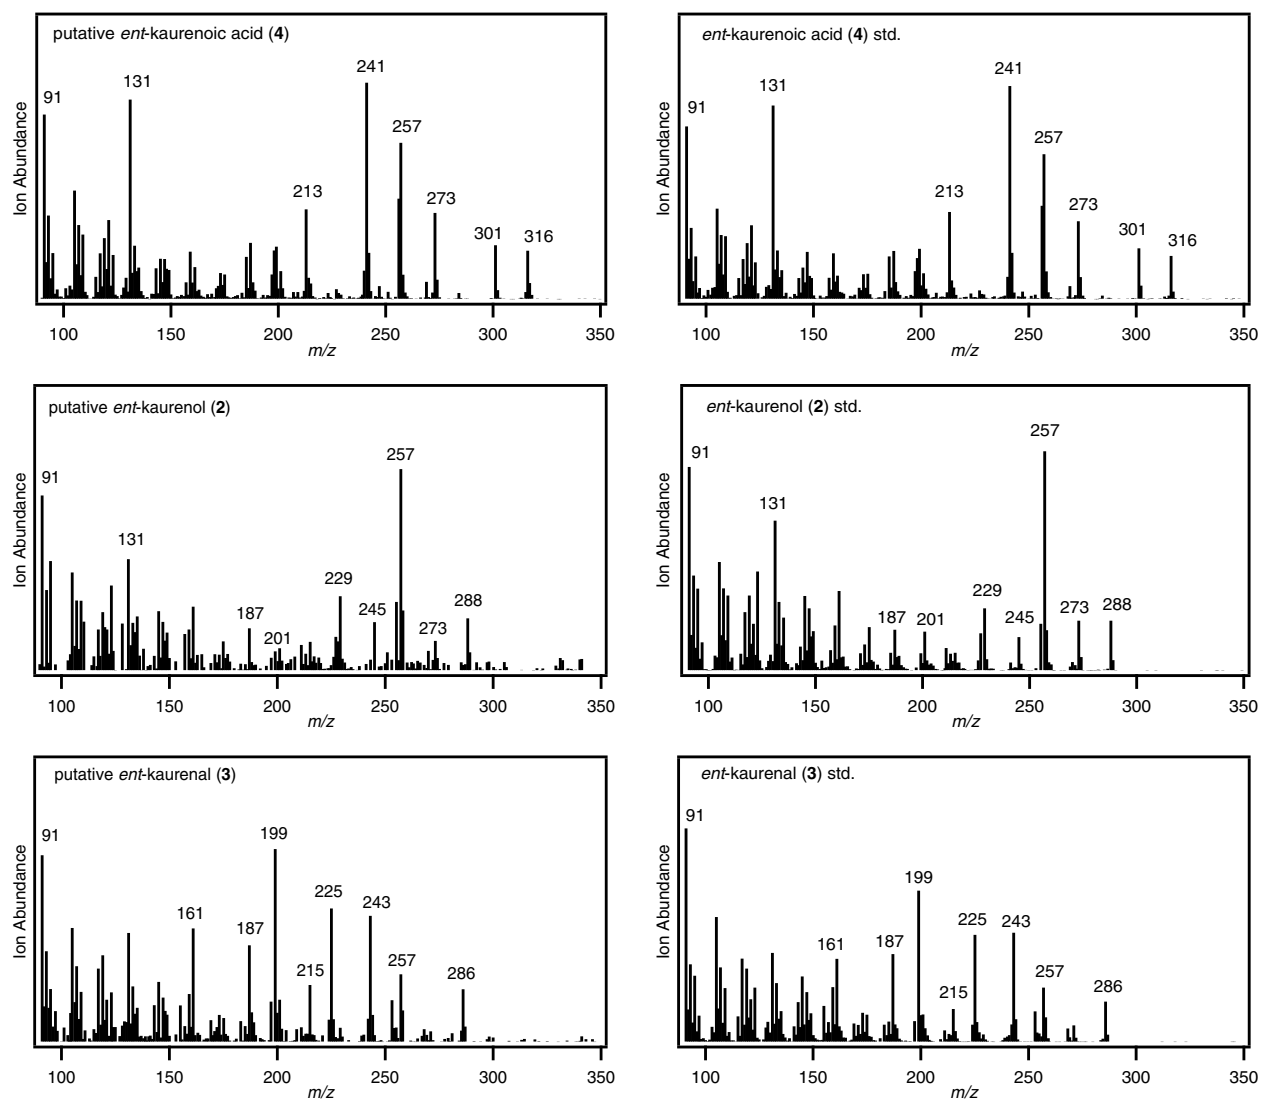

**Supplementary Figure 4. Mass spectra of putative *ent*-kaurenol (2), *ent*-kaurenal (3), and *ent*-kaurenoic acid (4) from CYP117 incubations.** To confirm production of 2, 3, and 4 from incubations of CYP117 with *ent*-kaurene (1), 2, or 3, the mass spectrum for each compound was compared to that of an authentic standard (std.). These mass spectra correspond to the peaks identified in Figure 3 and Supplementary Figure 5.

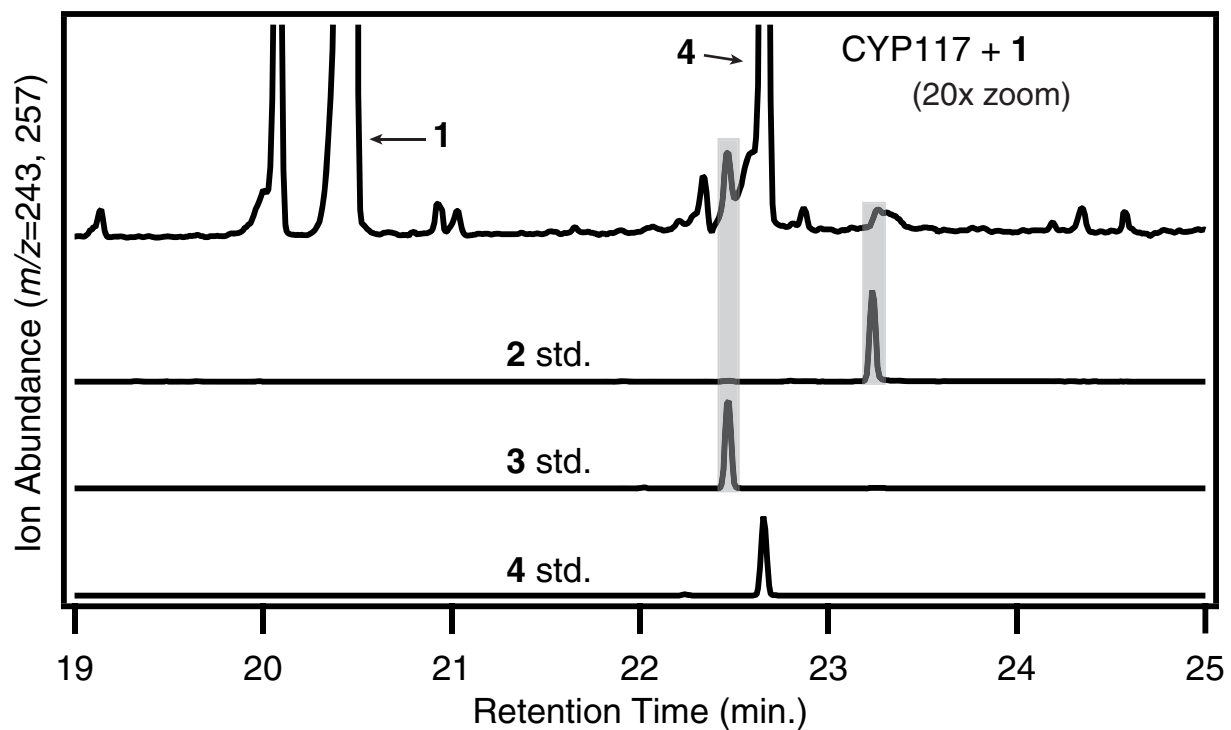

**Supplementary Figure 5. Trace amounts of *ent*-kaurenol (2) and *ent*-kaurenal (3) are produced from incubation of *ent*-kaurene (1) with CYP117.** In addition to the C-19 acid, *ent*-kaurenoic acid (4), the C-19 alcohol (2) and aldehyde (3) are produced from incubations of 1 with CYP117, as shown here in gas chromatograms with comparison to authentic standards (stds.) of 2, 3, and 4, confirming the sequential oxidation of C-19 catalyzed by CYP117. To obtain sufficient peak resolution for detection of 2 and 3, the sample shown here was run using a decreased rate of temperature increase, resulting in retention time change from those seen in Figure 3.

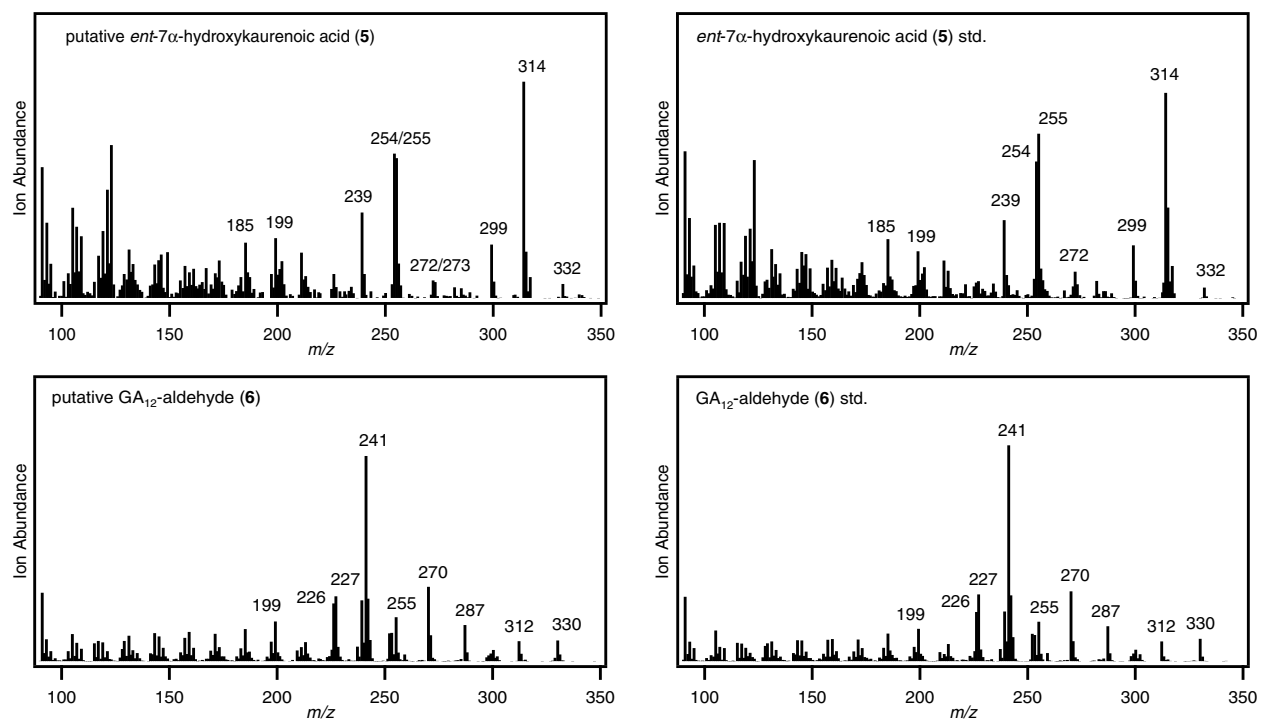

**Supplementary Figure 6. Mass spectra of putative *ent*-7 $\alpha$ -hydroxykaurenoic acid (5) and GA<sub>12</sub>-aldehyde (6) detected in CYP114 (+/- Fd<sub>GA</sub>) incubations.** To confirm production of 5 and 6 from incubations of CYP114 (+/-Fd<sub>GA</sub>) with *ent*-kaurenoic acid (4), the mass spectrum for each compound was compared to that of an authentic standard (std.). These mass spectra correspond to the peaks identified in Figure 4.



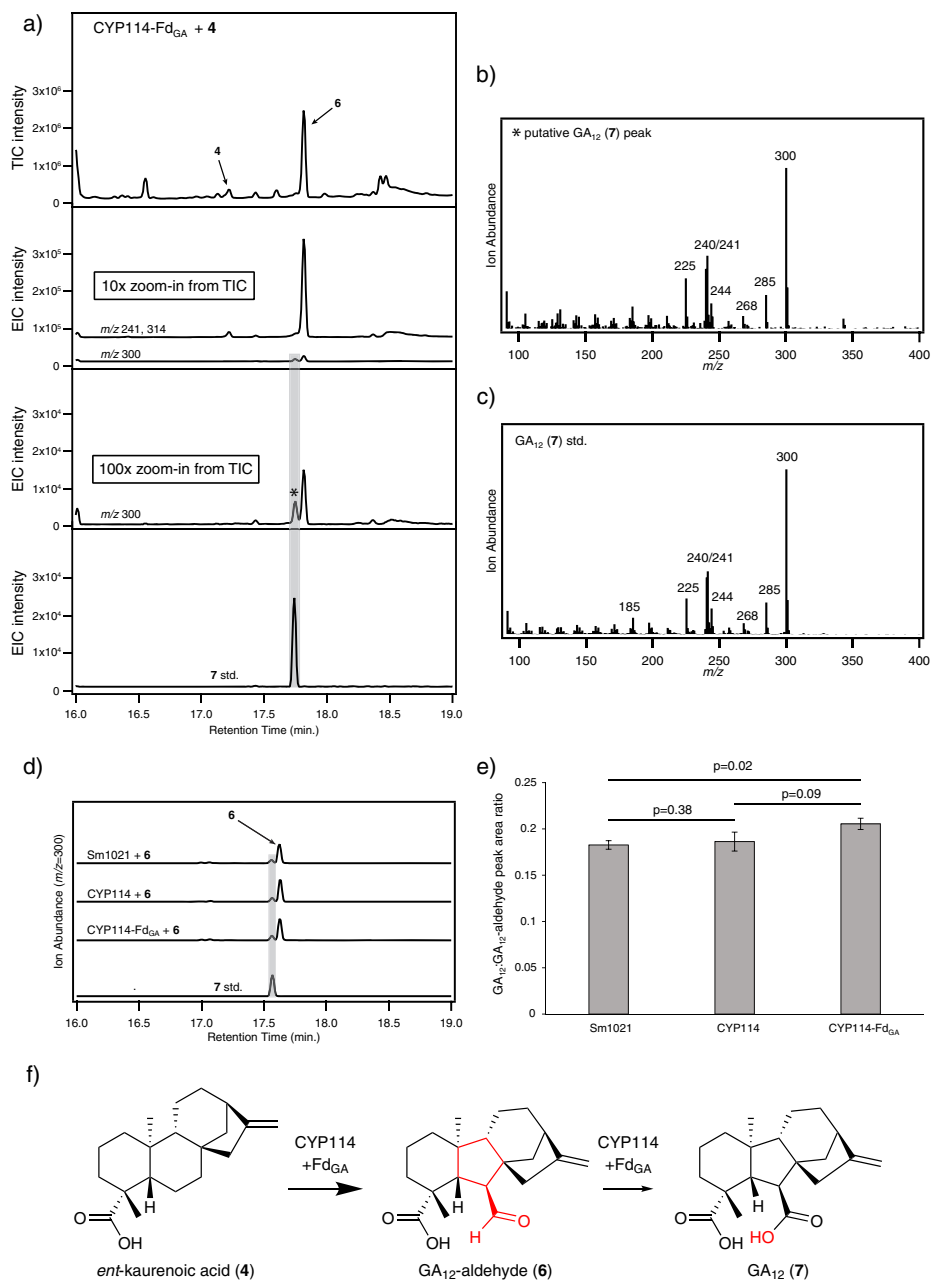

**Supplementary Figure 7. CYP114-Fd<sub>GA</sub> can oxidize GA<sub>12</sub>-aldehyde (6) to GA<sub>12</sub> (7) at low efficiency.**

a) Incubation of *ent*-kaurenoic acid (4) in cells expressing CYP114-Fd<sub>GA</sub> results in trace amounts of a putative GA<sub>12</sub> (7) peak being produced in addition to the much more substantial amounts of GA<sub>12</sub>-aldehyde (6). In particular, 7 is only detectable with compound specific ion extraction (*m/z*=300) and is of low abundance (note the scale changes on the y-axis for each chromatogram; TIC, total ion chromatogram; EIC, extracted ion chromatogram). b) The mass spectrum obtained from the putative 7 peak (\*) matches that of c) the mass spectrum from an authentic 7 standard (std.). d) Incubating 6 in cells expressing CYP114-Fd<sub>GA</sub> results in a small increase in the amount of 7 extracted (6 substrate contains trace amounts of 7). e) Quantification of the peak area ratio of 7 to 6 shows that turnover from 6 to 7 is significantly (Student's t-test; *p*<0.05), but only slightly higher in cells expressing CYP114-Fd<sub>GA</sub>; *n*=3 for each culture, data represent mean values ± standard deviation. f) Thus, while CYP114-Fd<sub>GA</sub> converts 4 mainly to 6, 7 is also produced in miniscule amounts. This reduced catalytic efficiency is indicated in this scheme by arrow size.

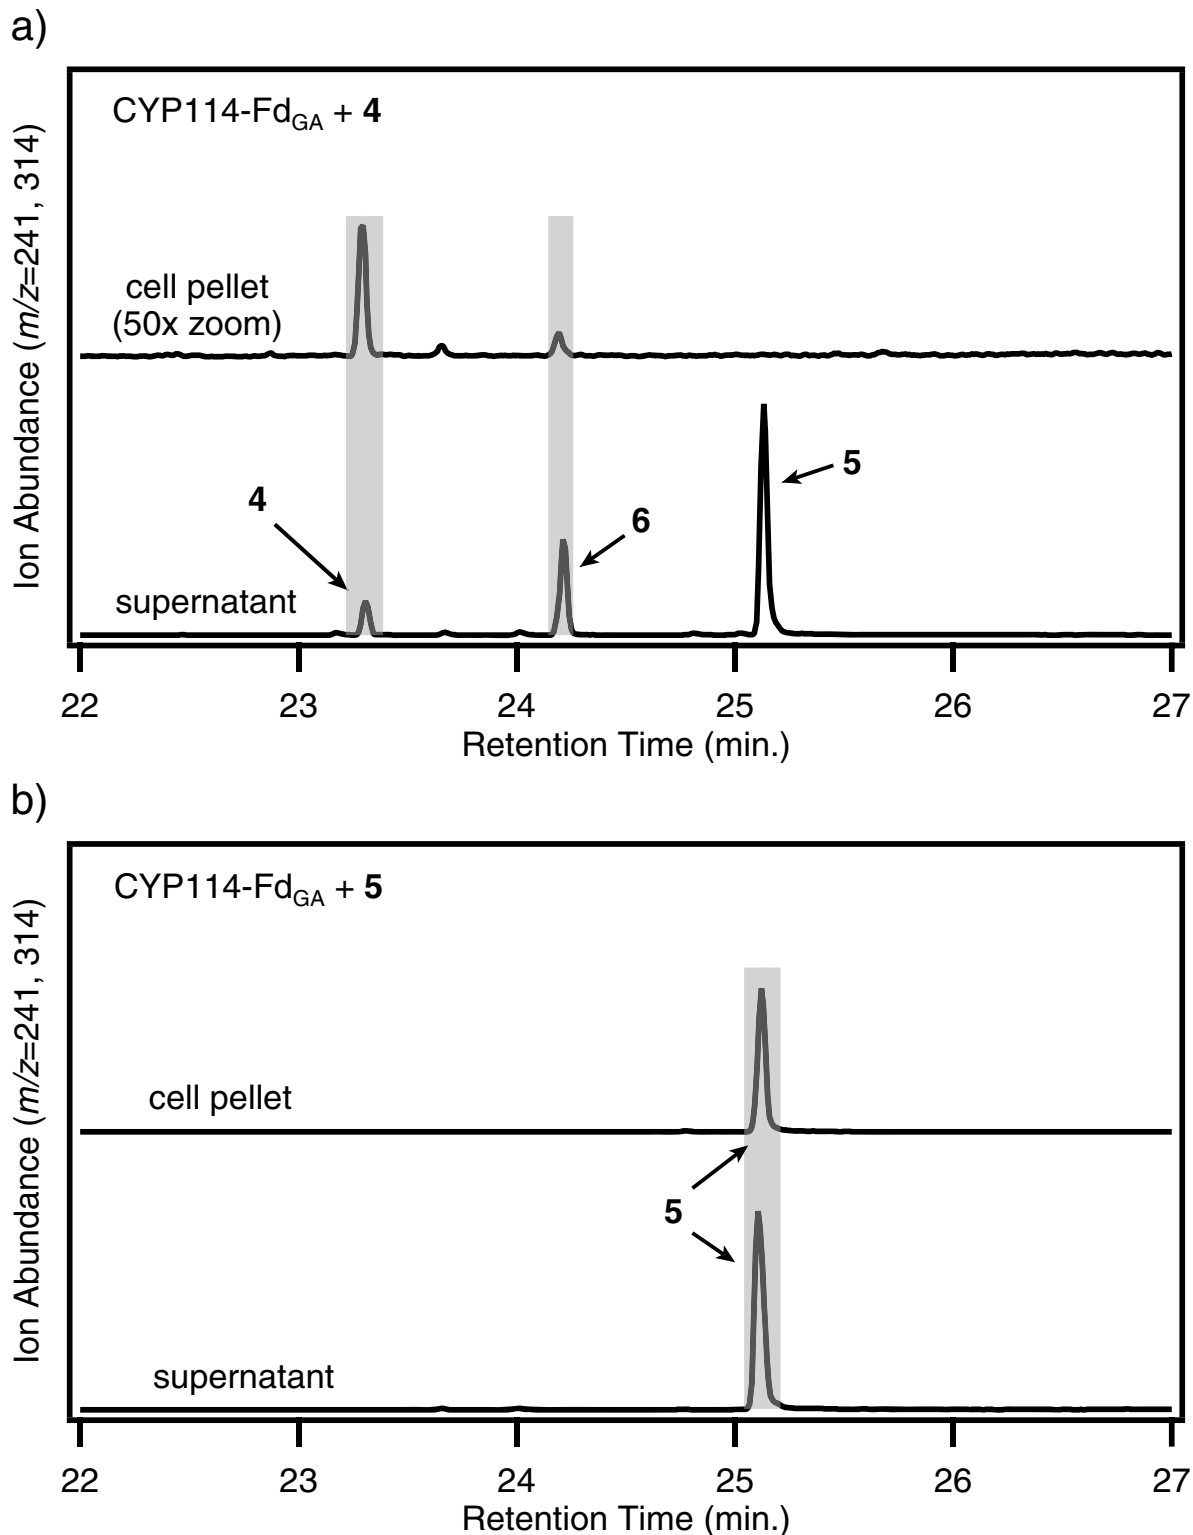

**Supplementary Figure 8.** *ent-7 $\alpha$ -hydroxykaurenoic acid (5)* is sufficiently transported into *S. meliloti* cells heterologously expressing CYP114-Fd<sub>GA</sub>. a) *ent*-kaurenoic acid (4), which is converted to *ent-7 $\alpha$ -hydroxykaurenoic acid (5)* and GA<sub>12</sub>-aldehyde (6) by CYP114-Fd<sub>GA</sub>, is found in both the cell pellet and supernatant b) Similarly, 5 is found in both the cell pellet and supernatant, but is unable to be further transformed.

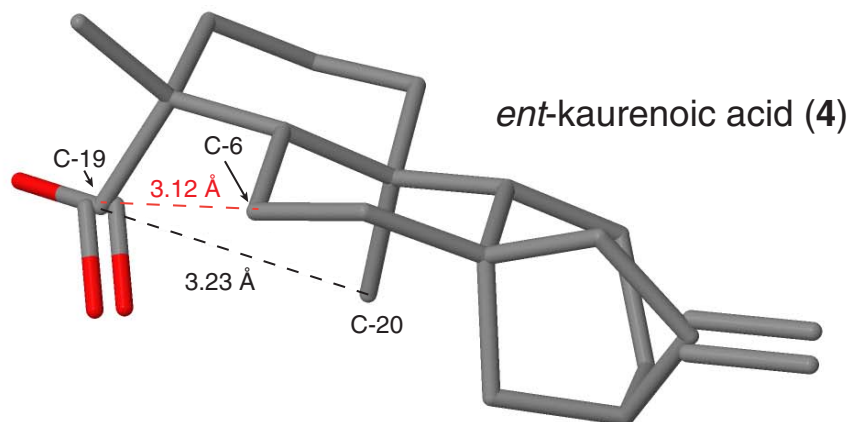

Jmol

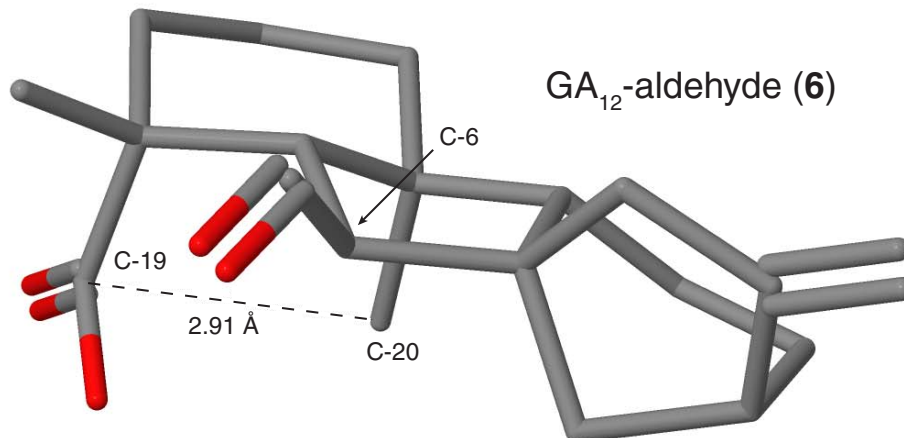

Jmol

**Supplementary Figure 9. Molecular modeling supports the role of a C-19 carboxylate in ring contraction and  $\gamma$ -lactone formation.** A three-dimensional rendering of *ent*-kaurenoic acid (**4**) shows that the C-19 is in close proximity (3.12 Å) to C-6, allowing for potential stabilization of a C-6 carbocation by the C-19 carboxylate. Furthermore, B-ring contraction from the conversion of **4** to  $GA_{12}$ -aldehyde (**6**) brings the C-19 carboxylate 0.32 Å closer to C-20 (from 3.23 Å in **4** to 2.91 Å in **6**) potentially aiding subsequent C-20 loss and lactone formation in the reaction catalyzed by the GA 20-oxidase.

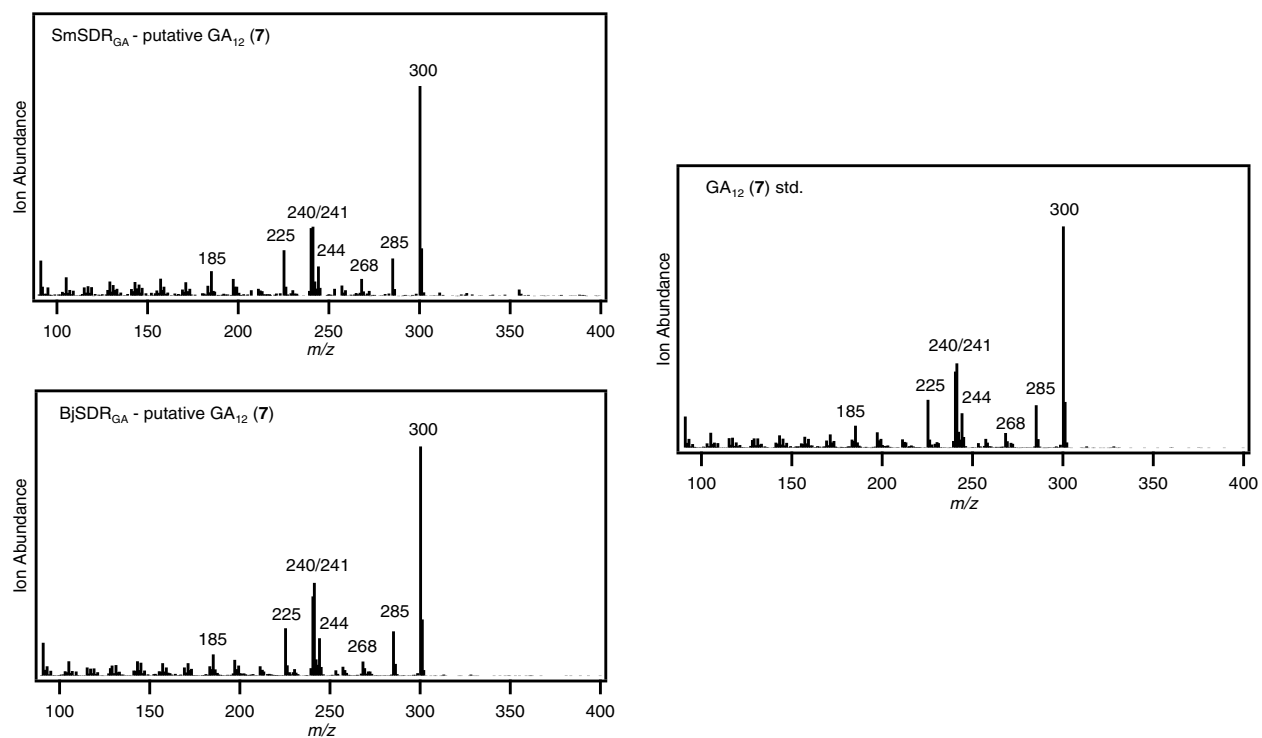

**Supplementary Figure 10. Mass spectra of putative GA<sub>12</sub> (7) from SfSDR<sub>GA</sub> and BjSDR<sub>GA</sub> incubations.** To confirm production of **7** from incubations of SfSDR<sub>GA</sub> or BjSDR<sub>GA</sub> with GA<sub>12</sub>-aldehyde (**6**), the mass spectrum from each was compared to that of an authentic standard (std.). These mass spectra correspond to the peaks identified in Figure 5 and Supplementary Figure 11.

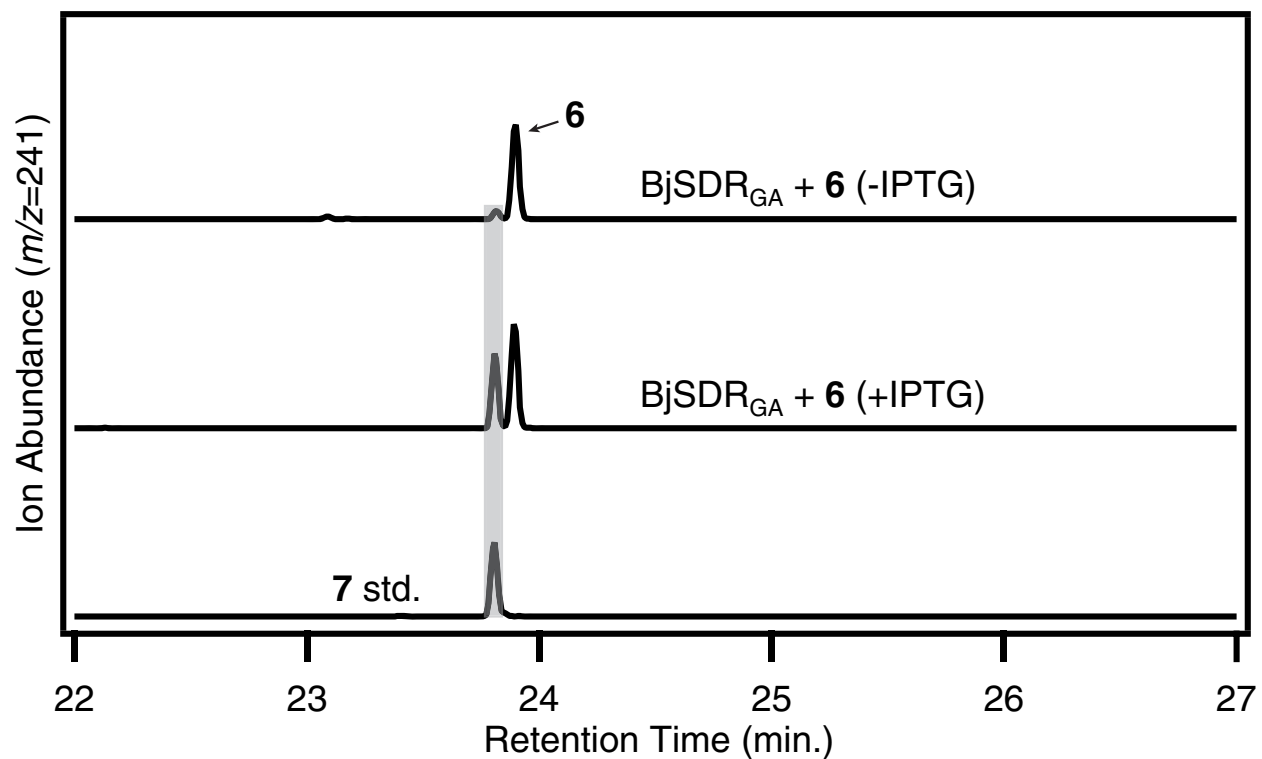

**Supplementary Figure 11.** SDR<sub>GA</sub> from *Bradyrhizobium japonicum* oxidizes GA<sub>12</sub>-aldehyde (6) to GA<sub>12</sub> (7). When expressed and induced in *E. coli*, BjSDR<sub>GA</sub> elicits the same function as SDR<sub>GA</sub> from *S. fredii*, as shown here through gas chromatograms with comparison to an authentic standard (std.) of 7. IPTG=isopropyl β-D-1-thiogalactopyranoside; used to induce SDR<sub>GA</sub> expression.

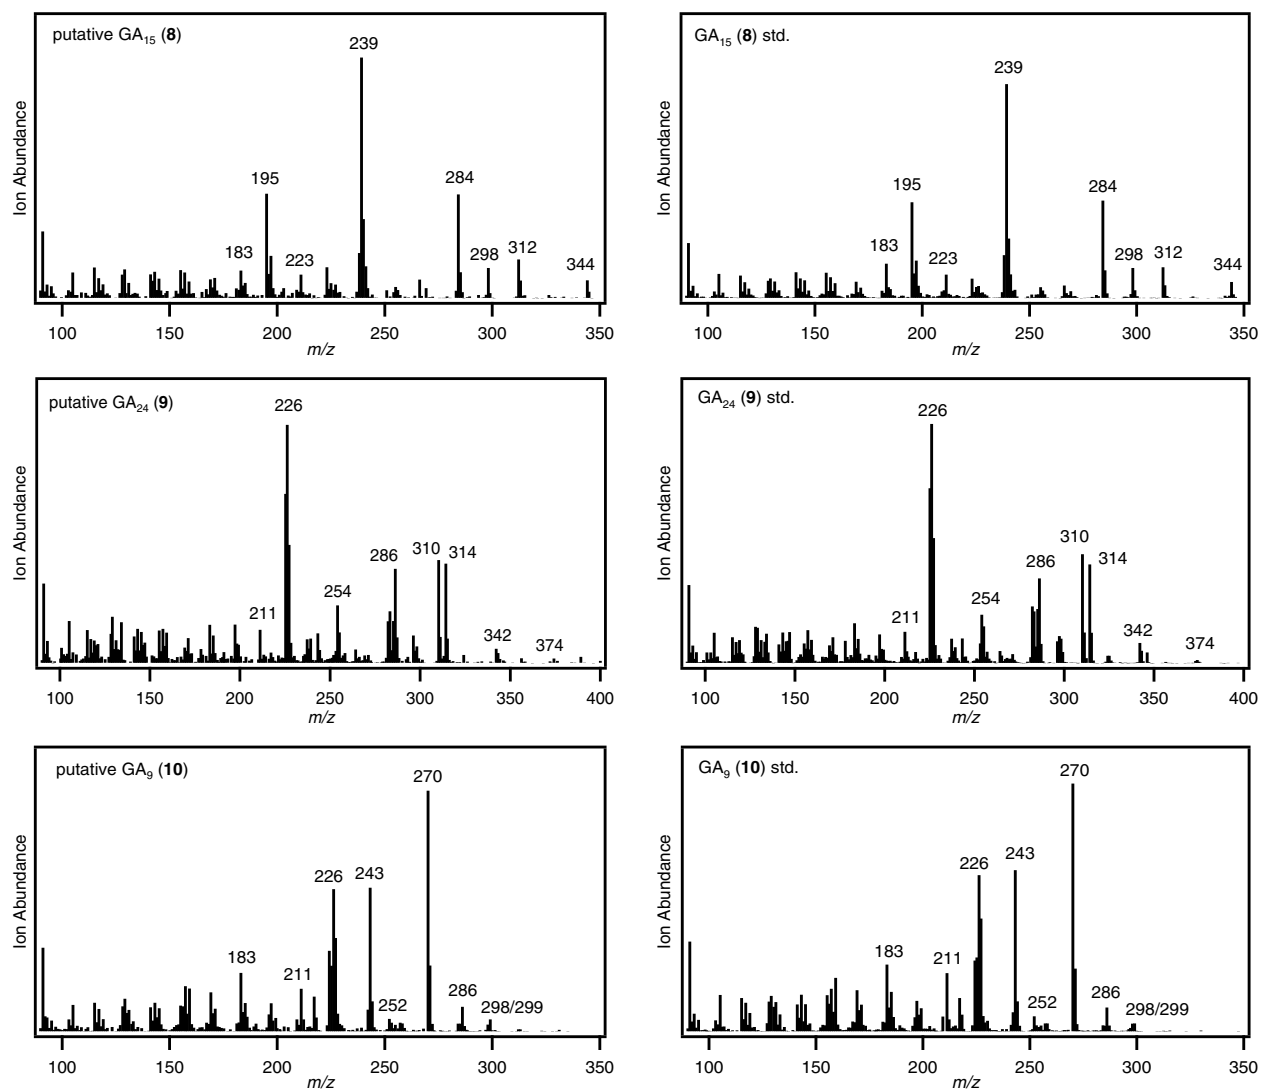

**Supplementary Figure 12. Mass spectra of putative GA<sub>15</sub> (8), GA<sub>24</sub> (9), and GA<sub>9</sub> (10) from CYP112 incubations.** To confirm production of 8, 9, and 10 from incubations of CYP112 with GA<sub>12</sub> (7), 8, or 9, the mass spectrum for each compound was compared to that of an authentic standard (std.). These mass spectra correspond to the peaks identified in Figure 6.

**Supplementary Table 1.** Products (methyl esters and TMS-ethers) identified by GC-MS from incubations of <sup>14</sup>C-labeled and unlabeled GA precursors with bacteroids of *B. japonicum* CYP knock-out mutants.

| Mutant           | Substrate                                                  | Product(s)<br>(% recovered products)                                       | Mass spectrum of Me ester<br>TMSi ether<br>m/z (% relative abundance)                                                                                                                     |
|------------------|------------------------------------------------------------|----------------------------------------------------------------------------|-------------------------------------------------------------------------------------------------------------------------------------------------------------------------------------------|
| <i>BjΔcyp117</i> | <i>ent</i> -kaurenol                                       | <i>ent</i> -kaurenol (100)                                                 | M <sup>+</sup> 360(7), 345(8), 270(68), 257(100), 255(27), 241(14), 227(18), 201(17), 187(14), 175(22), 161(24), 147(21), 131(20), 123(68)                                                |
| <i>BjΔcyp117</i> | <i>ent</i> -[ <sup>14</sup> C <sub>1</sub> ]kaurenoic acid | <i>ent</i> -6β,7β-diOH-[ <sup>14</sup> C <sub>1</sub> ]kaurenoic acid (31) | M <sup>+</sup> 594(0.2), 479(85), 404(26), 389(7), 329(7), 269(100), 255(14), 209(36)                                                                                                     |
|                  |                                                            | [ <sup>14</sup> C <sub>1</sub> ]GA <sub>15</sub> (<1)                      | M <sup>+</sup> 346(12), 314(10), 286(55), 241(100), 195(28)                                                                                                                               |
|                  |                                                            | [ <sup>14</sup> C <sub>1</sub> ]GA <sub>12</sub> (2)                       | 330(13), 302(100), 300(28), 287(19), 271(13), 243(34), 242(24), 227(26), 187(14)                                                                                                          |
|                  |                                                            | GA <sub>12</sub> norketone (47)                                            | M <sup>+</sup> 362(14), 334(21), 330(100), 302(69), 287(27), 274(21), 271(27), 270(37), 259(48), 255(33), 243(76), 242(39), 227(36), 215(30), 201(36), 199(37), 173(16), 159(24), 145(26) |
|                  |                                                            | GA <sub>12</sub> norketone standard                                        | M <sup>+</sup> 362(15), 334(18), 330(100), 302(59), 287(24), 274(16), 271(20), 270(27), 259(36), 255(25), 243(62), 242(28), 227(25), 215(21), 201(27), 199(25), 173(10), 159(16), 145(16) |
| <i>BjΔcyp117</i> | [ <sup>14</sup> C <sub>1</sub> ]GA <sub>12</sub>           | [ <sup>14</sup> C <sub>1</sub> ]GA <sub>15</sub> (8)                       | M <sup>+</sup> 346(13), 314(21), 286(46), 241(100), 195(21)                                                                                                                               |
|                  |                                                            | Putative GA <sub>15</sub> norketone enolTMS (10)                           | M <sup>+</sup> 418(100), 403(17), 387(8), 360(21), 359(24), 345(16), 301(11), 270(10), 243(13), 241(17), 237(11), 223(13), 197(10), 157(9), 143(42), 117(34)                              |
|                  |                                                            | [ <sup>14</sup> C <sub>1</sub> ]GA <sub>24</sub> (6)                       | M <sup>+</sup> 376(3), 344(26), 316(67), 312(28), 288(61), 287(51), 284(36), 256(33), 229(62), 228(100), 227(87)                                                                          |

|                  |                                                                  |                                                                                                                                                                                           |                                                                                                                                                             |
|------------------|------------------------------------------------------------------|-------------------------------------------------------------------------------------------------------------------------------------------------------------------------------------------|-------------------------------------------------------------------------------------------------------------------------------------------------------------|
|                  | Putative GA <sub>24</sub> norketone enolTMS (21)                 | M <sup>+</sup> 448(18), 433(5), 419(4), 387(10), 360(10), 359(10), 327(5), 298(11), 271(10), 270(12), 238(23), 223(8), 221(10), 179(7), 168(100), 143(27), 117(10)                        |                                                                                                                                                             |
|                  | [ <sup>14</sup> C <sub>1</sub> ]GA <sub>9</sub> (trace)          | M <sup>+</sup> 332(4), 300(100), 288(8), 272(93), 243(80), 229(60), 228(53)                                                                                                               |                                                                                                                                                             |
|                  | GA <sub>9</sub> norketone enolTMS (2)                            | M <sup>+</sup> 404(100), 389(16), 361(24), 360(16), 345(37), 301(27), 287(10), 270(6), 243(9), 211(13), 195(6), 183(9), 159(14), 143(52)                                                  |                                                                                                                                                             |
|                  | [ <sup>14</sup> C <sub>1</sub> ]GA <sub>12</sub> (5)             | M <sup>+</sup> 362(1), 330(14), 302(100), 287(22), 271(6), 243(31), 242(26), 227(16), 187(11)                                                                                             |                                                                                                                                                             |
|                  | GA <sub>12</sub> norketone (48)                                  | M <sup>+</sup> 362(14), 334(20), 330(100), 302(58), 287(27), 274(20), 271(22), 270(33), 259(43), 255(29), 243(68), 242(33), 227(30), 215(24), 201(31), 199(32), 173(12), 159(20), 145(21) |                                                                                                                                                             |
| <b>BjΔcyp114</b> | <i>ent</i> -kaurenol                                             | <i>ent</i> -kaurenol (44)                                                                                                                                                                 | M <sup>+</sup> 360(9), 345(8), 270(70), 257(100), 255(24), 241(12), 227(16), 201(14), 187(15), 175(18), 161(20), 147(29), 131(21)                           |
|                  |                                                                  | <i>ent</i> -kaurenal (41)                                                                                                                                                                 | M <sup>+</sup> 286(51), 271(20), 257(46), 253(13), 243(100), 225(22), 215(22), 199(25)                                                                      |
|                  |                                                                  | <i>ent</i> -kaurenoic acid (14)                                                                                                                                                           | M <sup>+</sup> 316(50), 301(39), 273(70), 257(100), 256(41), 241(70), 201(13), 187(22), 131(37), 121(57)                                                    |
| <b>BjΔcyp114</b> | <i>ent</i> -[ <sup>14</sup> C <sub>1</sub> ]kaurenoic acid       | <i>ent</i> -7-oxo-[ <sup>14</sup> C <sub>1</sub> ]kaurenoic acid (0.3) (13-OHKA 10%)                                                                                                      | M <sup>+</sup> 332(55), 300(11), 272(79), 257(33), 175(26), 149(100), 121(31)                                                                               |
| <b>BjΔcyp114</b> | <i>ent</i> -7α-OH-[ <sup>14</sup> C <sub>4</sub> ]kaurenoic acid | <i>ent</i> -7-oxo-[ <sup>14</sup> C <sub>4</sub> ]kaurenoic acid (66)                                                                                                                     | M <sup>+</sup> 338(51), 336(29), 330(7), 306(7), 278(67), 276(38), 270(9), 263(25), 261(24), 205(10), 181(11), 177(12), 151(100), 149(38), 147(16), 121(27) |



|                                                                                    |                                                       |                                                                                                                                                                                                                             |
|------------------------------------------------------------------------------------|-------------------------------------------------------|-----------------------------------------------------------------------------------------------------------------------------------------------------------------------------------------------------------------------------|
| <b><i>BjΔcyp114</i></b> [ <sup>14</sup> C <sub>4</sub> ]GA <sub>12</sub> -aldehyde | [ <sup>14</sup> C <sub>4</sub> ]GA <sub>12</sub> (25) | M <sup>+</sup> 368(1), 336(16), 334(13), 328(7), 308(100), 306(69), 300(48), 293(11), 291(16), 285(11), 247(37), 246(37), 241(15), 231(17), 229(17)                                                                         |
|                                                                                    | [ <sup>14</sup> C <sub>4</sub> ]GA <sub>15</sub> (5)  | M <sup>+</sup> 352(12), 350(8), 344(5), 320(15), 318(11), 306(17), 304(11), 290(44), 288(21), 245(100), 243(39), 239(39), 201(31)199(18)                                                                                    |
|                                                                                    | [ <sup>14</sup> C <sub>4</sub> ]GA <sub>24</sub> (35) | M <sup>+</sup> 382(3), 380(2), 350(27), 348(15), 322(66), 320(49), 318(45), 314(34), 294(35), 293(47), 292(53), 290(47), 286(30), 262(26), 261(30), 260(26), 233(46), 232(80), 231(100), 229(43), 227(25), 226(28), 225(29) |
|                                                                                    | [ <sup>14</sup> C <sub>4</sub> ]GA <sub>9</sub> (25)  | M <sup>+</sup> 338(5), 336(4), 306(100), 304(54), 298(33), 294(15), 292(13), 276(90), 274(43), 270(27), 251(47), 249(33), 243(18), 233(60), 232(63), 231(48), 230(40), 227(18), 226(18)                                     |
| <b><i>BjΔcyp114</i></b> [ <sup>14</sup> C <sub>1</sub> ]GA <sub>12</sub>           | [ <sup>14</sup> C <sub>1</sub> ]GA <sub>15</sub> (13) | M <sup>+</sup> 346(16), 314(25), 286(53), 241(100), 195(24)                                                                                                                                                                 |
|                                                                                    | [ <sup>14</sup> C <sub>1</sub> ]GA <sub>24</sub> (56) | M <sup>+</sup> 376(5), 344(35), 316(100), 312(42), 288(76), 287(58), 284(41), 256(45), 229(63), 228(91), 227(93)                                                                                                            |
|                                                                                    | [ <sup>14</sup> C <sub>1</sub> ]GA <sub>9</sub> (31)  | M <sup>+</sup> 332(6), 300(100), 288(14), 272(99), 243(50), 229(52), 228(55), 217(28)                                                                                                                                       |
| <b><i>BjΔcyp112</i></b> <i>ent</i> -kaurenol                                       | <i>ent</i> -kaurenol (88)                             | M <sup>+</sup> 360(8), 345(8), 270(73), 257(100), 255(25), 241(14), 227(17), 201(15), 187(14), 175(21), 161(23), 147(21), 131(16), 123(65)                                                                                  |
|                                                                                    | <i>ent</i> -kaurenal (9)                              | M <sup>+</sup> 286(54), 271(17), 257(53), 253(9), 243(100), 225(39), 215(17), 199(33)                                                                                                                                       |
|                                                                                    | <i>ent</i> -kaurenoic acid (3)                        | M <sup>+</sup> 316(56), 301(38), 273(80), 257(100), 256(34), 241(59), 201(11), 187(21), 131(44), 121(57)                                                                                                                    |

|                  |                                                            |                                                                      |                                                                                                                                                                                              |
|------------------|------------------------------------------------------------|----------------------------------------------------------------------|----------------------------------------------------------------------------------------------------------------------------------------------------------------------------------------------|
| <b>BjΔcyp112</b> | <i>ent</i> -[ <sup>14</sup> C <sub>1</sub> ]kaurenoic acid | <i>ent</i> -7α-OH[ <sup>14</sup> C <sub>1</sub> ]kaurenoic acid (<1) | M <sup>+</sup> 406(38), 391(12), 316(100), 301(29), 257(57), 256(46), 241(26)                                                                                                                |
|                  |                                                            | [ <sup>14</sup> C <sub>1</sub> ]GA <sub>12</sub> (37)                | M <sup>+</sup> 362((1), 330(20), 302(100), 300(29), 287(18), 271(7), 243(29), 242(24), 227(15), 187(8)                                                                                       |
| <b>BjΔcyp112</b> | [ <sup>14</sup> C <sub>1</sub> ]GA <sub>12</sub>           | [ <sup>14</sup> C <sub>1</sub> ]GA <sub>12</sub> (93)                | M <sup>+</sup> 362(1), 330(19), 302(100), 300(14), 287(16), 271(7), 243(27), 242(22), 227(15), 187(8)                                                                                        |
|                  |                                                            | [ <sup>14</sup> C <sub>1</sub> ]GA <sub>12</sub> norketone (7)       | M <sup>+</sup> 362(21), 334(16), 330(100), 302(72), 287(17), 271(33), 270(22), 259(21), 255(23), 243(44), 242(37), 227(15), 215(37), 201(27), 199(22), 173(17), 159(10), 145(11)             |
| <b>BjΔcyp112</b> | [ <sup>14</sup> C <sub>1</sub> ]GA <sub>15</sub>           | [ <sup>14</sup> C <sub>1</sub> ]GA <sub>15</sub> (96)                | M <sup>+</sup> 346(14), 314(15), 300(10), 286(43), 241(100), 195(19)                                                                                                                         |
|                  |                                                            | Putative GA <sub>15</sub> norketone enolTMS (3)                      | M <sup>+</sup> 418(100), 403(19), 387(7), 360(15), 359(23), 345(14), 301(8), 270(10), 243(17), 241(13), 237(9), 223(11), 197(10), 143(42)                                                    |
|                  |                                                            | [ <sup>14</sup> C <sub>1</sub> ]GA <sub>24</sub> (1)                 | M <sup>+</sup> 376(6), 344(32), 316(93), 312(29), 288(76), 287(65), 285(33), 284(34), 256(35), 229(64), 228(95), 227(100)                                                                    |
| <b>BjΔcyp112</b> | [ <sup>14</sup> C <sub>1</sub> ]GA <sub>24</sub>           | [ <sup>14</sup> C <sub>1</sub> ]GA <sub>24</sub> (>99)               | M <sup>+</sup> 376(3), 344(31), 316(85), 312(28), 288(76), 287(57), 285(37), 284(33), 256(36), 229(64), 228(92), 227(100)                                                                    |
|                  |                                                            | Putative GA <sub>24</sub> norketone (<1)                             | 348(24), 330(17), 320(95), 316(100), 298(27), 288(81), 285(26), 284(27), 273(23), 270(21), 260(27), 256(79), 246(46), 245(40), 229(67), 228(54), 227(64), 213(26), 194(22), 185(51), 168(72) |

**Supplementary Table 2.** Products (methyl esters and TMS-ethers) identified by GC-MS from incubations of <sup>14</sup>C-labeled GA precursors with bacteroids of *S. fredii* CYP knock-out mutants.

| Mutant           | Substrate                                                  | Product(s)<br>(% recovered products)                                  | Mass spectrum of Me ester<br>TMSi ether<br>m/z (% relative abundance)                                                                                                                     |
|------------------|------------------------------------------------------------|-----------------------------------------------------------------------|-------------------------------------------------------------------------------------------------------------------------------------------------------------------------------------------|
| <i>SfΔcyp117</i> | <i>ent</i> -[ <sup>14</sup> C <sub>1</sub> ]kaurenoic acid | <i>ent</i> -7α-OH[ <sup>14</sup> C <sub>1</sub> ]kaurenoic acid (5)   | M <sup>+</sup> 406(44), 391(14), 316(100), 301(28), 257(50), 256(45), 241(41)                                                                                                             |
|                  |                                                            | [ <sup>14</sup> C <sub>1</sub> ]GA <sub>12</sub> (9)                  | 330(15), 302(100), 300(14), 287(18), 271(9), 243(30), 242(18), 227(17), 187(10)                                                                                                           |
|                  |                                                            | <i>ent</i> -3-OH[ <sup>14</sup> C <sub>1</sub> ]kaurenoic acid (6)    | M <sup>+</sup> 406(5), 391(15), 346(11), 346(11), 316(45), 301(13), 277(89), 257(36), 241(19), 217(8), 189(100)                                                                           |
|                  |                                                            | <i>ent</i> -15β-OH[ <sup>14</sup> C <sub>1</sub> ]kaurenoic acid (12) | M <sup>+</sup> 406(7), 391(2), 316(11), 301(14), 274(10), 257(26), 241(11), 199(13), 197(11), 158(100)                                                                                    |
|                  |                                                            | <i>ent</i> -[ <sup>14</sup> C <sub>1</sub> ]kaurenoic acid (46)       | M <sup>+</sup> 318(55), 303(46), 273(100), 259(93), 258(59), 257(54), 243(83), 213(48), 189(27), 121(97)                                                                                  |
|                  |                                                            | <i>ent</i> -kaurenoic acid norketone (5)                              | M <sup>+</sup> 318(21), 300(5), 286(19), 259(100), 245(12), 241(12), 218(9), 189(8)                                                                                                       |
| <i>SfΔcyp117</i> | [ <sup>14</sup> C <sub>1</sub> ]GA <sub>12</sub>           | [ <sup>14</sup> C <sub>1</sub> ]GA <sub>12</sub> (65)                 | M <sup>+</sup> 362(1), 330(17), 302(100), 300(7), 287(17), 271(6), 243(28), 242(22), 227(15), 187(8)                                                                                      |
|                  |                                                            | GA <sub>12</sub> norketone (6)                                        | M <sup>+</sup> 362(15), 334(18), 330(100), 302(59), 287(24), 274(16), 271(23), 270(35), 259(41), 255(26), 243(59), 242(30), 227(27), 215(23), 201(27), 199(28), 173(11), 159(15), 145(15) |
|                  |                                                            | [ <sup>14</sup> C <sub>1</sub> ]GA <sub>15</sub> (29)                 | M <sup>+</sup> 346(15), 314(19), 300(12), 286(47), 241(100), 213(8), 195(21)                                                                                                              |
|                  |                                                            | [ <sup>14</sup> C <sub>1</sub> ]GA <sub>24</sub> (<1)                 | 344(24), 316(81), 312(43), 288(94), 287(61), 285(38), 284(41), 256(54), 229(60), 228(95), 227(100)                                                                                        |

|                  |                                                                      |                                                                          |                                                                                                                                                                                                                                 |
|------------------|----------------------------------------------------------------------|--------------------------------------------------------------------------|---------------------------------------------------------------------------------------------------------------------------------------------------------------------------------------------------------------------------------|
| <b>SfΔcyp114</b> | <i>ent</i> -[ <sup>14</sup> C <sub>1</sub> ]kaurenoic acid           | <i>ent</i> -[ <sup>14</sup> C <sub>1</sub> ]kaurenoic acid (100)         | M <sup>+</sup> 318(55), 303(40),<br>273(100), 259(95), 258(57),<br>257(47), 243(81), 213(48),<br>189(24), 121(93)                                                                                                               |
| <b>SfΔcyp114</b> | <i>ent</i> -7α-OH-<br>[ <sup>14</sup> C <sub>4</sub> ]kaurenoic acid | <i>ent</i> -7α-OH-[ <sup>14</sup> C <sub>4</sub> ]kaurenoic<br>acid (58) | M <sup>+</sup> 412(39), 410(47),<br>408(22), 404(3), 397(14),<br>395(17), 322(86), 320(100),<br>318(50), 307(40), 305(44),<br>263(51), 262(51), 261(70),<br>260(54), 259(37), 247(38),<br>245(43), 240(30), 227(29),<br>225(31) |
|                  |                                                                      | 7-oxo-[ <sup>14</sup> C <sub>4</sub> ]kaurenoic acid (42)                | M <sup>+</sup> 338(36), 336(39),<br>334(20), 330(3), 306(6),<br>304(7), 278(48), 276(60),<br>274(31), 263(19), 261(29),<br>259(17), 205(8), 203(11),<br>181(14), 179(17), 177(15),<br>151(100), 149(68), 123(21),<br>121(32)    |
| <b>SfΔcyp114</b> | [ <sup>14</sup> C <sub>4</sub> ]GA <sub>12</sub> -aldehyde           | [ <sup>14</sup> C <sub>4</sub> ]GA <sub>12</sub> (60)                    | M <sup>+</sup> 368(1), 336(18), 334(10),<br>328(7), 308(100), 306(61),<br>300(36), 293(16), 291(14),<br>285(7), 277(8), 247(32),<br>246(28), 241(11), 231(16),<br>229(11)                                                       |
|                  |                                                                      | [ <sup>14</sup> C <sub>4</sub> ]GA <sub>15</sub> (38)                    | M <sup>+</sup> 352(15), 350(9), 344(4),<br>320(18), 318(9), 306(12),<br>304(8), 290(50), 288(18),<br>284(15), 245(100), 243(48),<br>239(31), 201(32), 199(15)                                                                   |
|                  |                                                                      | [ <sup>14</sup> C <sub>4</sub> ]GA <sub>24</sub> (2)                     | 350(18), 348(17), 322(40),<br>320(36), 318(47), 314(28),<br>294(26), 293(48), 292(55),<br>290(52), 262(39), 261(19),<br>260(26), 233(60), 232(100),<br>231(73), 229(36), 226(23)                                                |
| <b>SfΔcyp114</b> | [ <sup>14</sup> C <sub>1</sub> ]GA <sub>12</sub>                     | [ <sup>14</sup> C <sub>1</sub> ]GA <sub>12</sub> (45)                    | M <sup>+</sup> 362(0.6), 330(17),<br>302(100), 300(8), 287(17),<br>271(6), 243(27), 242(21),<br>227(15), 187(8)                                                                                                                 |
|                  |                                                                      | GA <sub>12</sub> norketone (2)                                           | M <sup>+</sup> 362(17), 334(23),<br>330(100), 302(58), 287(23),<br>274(12), 271(15), 270(28),<br>259(36), 255(18), 243(58),<br>242(28), 227(23), 215(15),<br>201(22), 199(18), 173(12),<br>159(19), 148(23)                     |

|                  |                                                            |                                                                       |                                                                                                                                    |
|------------------|------------------------------------------------------------|-----------------------------------------------------------------------|------------------------------------------------------------------------------------------------------------------------------------|
|                  |                                                            | [ <sup>14</sup> C <sub>1</sub> ]GA <sub>15</sub> (50)                 | M <sup>+</sup> 346(16), 314(18),<br>300(12), 286(47), 241(100),<br>213(8), 195(19)                                                 |
|                  |                                                            | [ <sup>14</sup> C <sub>1</sub> ]GA <sub>24</sub> (3)                  | 344(40), 316(95), 312(44),<br>288(83), 287(62), 285(29),<br>284(53), 256(40), 229(49),<br>228(100), 227(91)                        |
| <b>SfΔcyp112</b> | <i>ent</i> -[ <sup>14</sup> C <sub>1</sub> ]kaurenoic acid | <i>ent</i> -7α-OH-[ <sup>14</sup> C <sub>1</sub> ]kaurenoic acid (10) | M <sup>+</sup> 406(46), 391(15),<br>316(100), 301(32), 257(68),<br>256(55), 241(32)                                                |
|                  |                                                            | [ <sup>14</sup> C <sub>1</sub> ]GA <sub>12</sub> (10)                 | 330(16), 302(100), 287(17),<br>271(6), 243(27), 242(26),<br>227(18), 187(10)                                                       |
|                  |                                                            | <i>ent</i> -15α-OH[ <sup>14</sup> C <sub>1</sub> ]kaurenoic acid (9)  | M <sup>+</sup> 406(6), 391(8), 316(8),<br>301(21), 274(15), 257(37),<br>241(18), 199(15), 197(15),<br>158(100)                     |
|                  |                                                            | 7-oxo-[ <sup>14</sup> C <sub>1</sub> ]kaurenoic acid (9)              | M <sup>+</sup> 332(32), 300(8), 272(66),<br>257(38), 175(31), 149(100)                                                             |
|                  |                                                            | <i>ent</i> -[ <sup>14</sup> C <sub>1</sub> ]kaurenoic acid (35)       | M <sup>+</sup> 318(56), 303(43),<br>273(100), 259(92), 258(59),<br>257(54), 243(87), 213(47),<br>189(26), 121(99)                  |
| <b>SfΔcyp112</b> | [ <sup>14</sup> C <sub>1</sub> ]GA <sub>12</sub>           | [ <sup>14</sup> C <sub>1</sub> ]GA <sub>12</sub> (100)                | M <sup>+</sup> 362(0.5), 330(15),<br>302(100), 300(7), 287(17),<br>271(6), 243(28), 242(22),<br>227(16), 187(8)                    |
| <b>SfΔcyp112</b> | [ <sup>14</sup> C <sub>1</sub> ]GA <sub>15</sub>           | [ <sup>14</sup> C <sub>1</sub> ]GA <sub>15</sub> (100)                | M <sup>+</sup> 346(12), 314(15),<br>300(12), 286(47), 241(100),<br>213(9), 195(25)                                                 |
| <b>SfΔcyp112</b> | [ <sup>14</sup> C <sub>1</sub> ]GA <sub>24</sub>           | [ <sup>14</sup> C <sub>1</sub> ]GA <sub>24</sub> (100)                | M <sup>+</sup> 376(3), 344(27), 316(76),<br>312(22), 288(67), 287(51),<br>285(36), 284(33), 256(35),<br>229(61), 228(85), 227(100) |

**Supplementary Table 3.** Products (methyl esters and TMS-ethers) identified by GC-MS from incubations of <sup>14</sup>C-labeled and unlabeled GA precursors with bacteroids of *B. japonicum* SDR<sub>GA</sub> or Fd<sub>GA</sub> knock-out mutants.

| Mutant                     | Substrate                                                          | Product(s)<br>(% recovered products)                                                           | Mass spectrum of Me ester<br>TMSi ether<br>m/z (% relative abundance)                                                                                                                                                               |
|----------------------------|--------------------------------------------------------------------|------------------------------------------------------------------------------------------------|-------------------------------------------------------------------------------------------------------------------------------------------------------------------------------------------------------------------------------------|
| <i>BjΔsdr<sub>GA</sub></i> | <i>ent</i> -kaurenol                                               | <i>ent</i> -kaurenoic acid (22)                                                                | M <sup>+</sup> 316(58), 301(43),<br>273(75), 257(100), 256(40),<br>241(73), 201(12), 187(29),<br>131(46), 121(49)                                                                                                                   |
|                            |                                                                    | <i>ent</i> -7 $\alpha$ -OH-kaurenoic acid (6)                                                  | M <sup>+</sup> 404(39), 389(20),<br>314(100), 299(31), 285(23),<br>255(60), 254(40), 239(27)                                                                                                                                        |
|                            |                                                                    | GA <sub>12</sub> -aldehyde (2)                                                                 | M <sup>+</sup> 330(12), 287(11),<br>270(48), 253(29), 241(100),<br>227(8), 199(21)                                                                                                                                                  |
|                            |                                                                    | GA <sub>12</sub> (18)                                                                          | M <sup>+</sup> 360(0.6), 328(21),<br>300(100), 285(20), 269(7),<br>241(27), 240(22), 225(16),<br>185(10)                                                                                                                            |
|                            |                                                                    | GA <sub>15</sub> (3)                                                                           | M <sup>+</sup> 344(12), 312(19),<br>298(13), 284(49), 239(100),<br>211(8), 195(22)                                                                                                                                                  |
| <i>BjΔsdr<sub>GA</sub></i> | <i>ent</i> -[ <sup>14</sup> C <sub>1</sub> ]kaurenoic acid<br>(KA) | <i>ent</i> -7 $\alpha$ -OH-[ <sup>14</sup> C <sub>1</sub> ]kaurenoic acid<br>(trace)           | M <sup>+</sup> 406(37), 391(34),<br>316(100), 257(73), 256(45),<br>241(35)                                                                                                                                                          |
|                            |                                                                    | <i>ent</i> -6 $\alpha$ ,7 $\alpha$ -diOH-[ <sup>14</sup> C <sub>1</sub> ]kaurenoic<br>acid (5) | 479(91), 404(26), 389(7),<br>329(8), 301(5), 269(100),<br>255(10), 209(41)                                                                                                                                                          |
|                            |                                                                    | <b>putative</b> <i>ent</i> -6 $\alpha$ ,7 $\alpha$ -di-OH-<br>kaurenoic acid norketone (39)    | 479(100), 419((5), 404(19),<br>389(5), 361(10), 329(27),<br>269(85), 255(14), 209(45)                                                                                                                                               |
|                            |                                                                    | Unknown <sup>14</sup> C <sub>1</sub> product 1 (11)                                            | 318(52), 314(100), 312(27),<br>299(17), 290(17), 286(43),<br>269(24), 268(25), 258(50),<br>257(89), 241(41), 239(56),<br>229(75), 227(52), 231(30),<br>197(24), 195(25), 191(28),<br>187(31), 185(31), 172(40),<br>150(61), 138(70) |

|                                   |                                                          |                                                                    |                                                                                                                                                                                                                                              |
|-----------------------------------|----------------------------------------------------------|--------------------------------------------------------------------|----------------------------------------------------------------------------------------------------------------------------------------------------------------------------------------------------------------------------------------------|
|                                   |                                                          | Unknown $^{14}\text{C}_1$ product 2 (31)                           | 316(20), 287(28), 285(13),<br>270(28), 253(13), 241(100),<br>239(31), 227(14), 213(17),<br>207(15), 197(19), 185(22),<br>159(24), 157(24)                                                                                                    |
| <b><i>BjΔsdr<sub>GA</sub></i></b> | <i>ent-7α</i> -OH<br>[ $^{14}\text{C}_4$ ]kaurenoic acid | <i>ent-6α,7α</i> -diOH-[ $^{14}\text{C}_4$ ]kaurenoic<br>acid (34) | 485(79), 483(70), 481(34),<br>477(17), 410(20), 408(25),<br>395(17), 393(9), 273(100),<br>271(59), 269(22), 257(13),<br>213(41), 207(21)                                                                                                     |
|                                   |                                                          | [ $^{14}\text{C}_4$ ]GA <sub>12</sub> -aldehyde (10)               | M <sup>+</sup> 338(11), 336(13), 330(5),<br>293(18), 291(15), 287(9),<br>278(38), 276(38), 274(22),<br>270(10), 261(24), 259(11),<br>247(69), 245(100), 243(45),<br>241(44), 231(14), 203(12),<br>199(23)                                    |
|                                   |                                                          | [ $^{14}\text{C}_4$ ]GA <sub>12</sub> (3)                          | 336(20), 334(29), 308(100),<br>306(93), 304(81), 302(40),<br>300(33), 291(20), 289(22),<br>287(20), 248(30), 247(14),<br>246(37), 245(26), 244(27),<br>243(20), 231(33), 227(25)                                                             |
|                                   |                                                          | [ $^{14}\text{C}_4$ ]GA <sub>15</sub> (13)                         | M <sup>+</sup> 352(16), 350(12), 344(3),<br>320(13), 318(19), 306(14),<br>304(11), 290(47), 288(43),<br>245(100), 243(97), 239(21),<br>201(36), 199(27)                                                                                      |
|                                   |                                                          | [ $^{14}\text{C}_4$ ]GA <sub>24</sub> (3)                          | 350(23), 348(20), 322(63),<br>320(55), 318(56), 314(47),<br>294(26), 293(49), 292(69),<br>290(74), 288(51), 285(33),<br>262(30), 233(88), 232(60),<br>231(100), 229(60), 228(58),<br>227(51), 226(21), 225(19)                               |
|                                   |                                                          | Unknown [ $^{14}\text{C}_4$ ] product 1(15)                        | 324(33), 322(44), 320(100),<br>318(72), 316(50), 314(15),<br>312(19), 303(17), 301(14),<br>292(26), 290(40), 274(18),<br>272(17), 271(25), 263(53),<br>261(81), 259(39), 245(39),<br>243(49), 233(64), 231(85),<br>229(55), 201(42), 187(44) |

|                            |                                                            |                                                                                                                                                                                                                                                                                                      |
|----------------------------|------------------------------------------------------------|------------------------------------------------------------------------------------------------------------------------------------------------------------------------------------------------------------------------------------------------------------------------------------------------------|
|                            | Unknown [ <sup>14</sup> C <sub>4</sub> ] product 2(15)     | 322(23), 320(32), 314(8),<br>291(26), 289(27), 276(16),<br>274(19), 259(14), 257(18),<br>245(100), 243(87), 241(33),<br>239(24), 231(20), 229(18),<br>203(20), 201(28), 189(22),<br>187(24)                                                                                                          |
| <b>BjAsdr<sub>GA</sub></b> | [ <sup>14</sup> C <sub>4</sub> ]GA <sub>12</sub> -aldehyde |                                                                                                                                                                                                                                                                                                      |
|                            | [ <sup>14</sup> C <sub>4</sub> ]GA <sub>12</sub> (4)       | 336(24), 334(8), 328(10),<br>308(100), 306(63), 304(14),<br>302(37), 300(45), 293(14),<br>291(17), 247(38), 246(35),<br>245(21), 244(16), 231(23),<br>229(15)                                                                                                                                        |
|                            | [ <sup>14</sup> C <sub>4</sub> ]GA <sub>15</sub> (7)       | M <sup>+</sup> 352(12), 350(7), 344(8),<br>320(13), 318(7), 306(8),<br>304(6), 290(37), 288(17),<br>284(17), 245(100), 243(39),<br>239(30), 201(25), 199(14)                                                                                                                                         |
|                            | [ <sup>14</sup> C <sub>4</sub> ]GA <sub>24</sub> (15)      | 350(25), 348(15), 342(9),<br>322(61), 320(39), 318(27),<br>316(15), 314(29), 294(30),<br>293(41), 292(43), 291(51),<br>290(40), 286(27), 262(22),<br>261(19), 260(24), 233(50),<br>232(82), 231(100), 230(38),<br>229(35), 227(29), 226(22),<br>225(28)                                              |
|                            | [ <sup>14</sup> C <sub>4</sub> ]GA <sub>9</sub> (15)       | M <sup>+</sup> 338(9), 336(4), 330(2),<br>306(100), 304(60), 298(40),<br>294(23), 292(18), 276(86),<br>274(48), 270(40), 251(54),<br>249(30), 243(32), 233(86),<br>232(68), 231(63), 230(43),<br>227(50), 226(46)                                                                                    |
|                            | Unknown [ <sup>14</sup> C <sub>4</sub> ] product 1(29)     | M <sup>+</sup> ? 352(6), 348(2), 344(2),<br>324(45), 322(31), 320(100),<br>318(57), 316(28), 312(35),<br>303(20), 301(10), 292(45),<br>290(28), 274(22), 263(72),<br>261(53), 259(22), 255(34),<br>245(41), 243(35), 233(69),<br>231(57), 229(24), 201(27),<br>187(30), 152(79), 140(79),<br>123(81) |



|                                   |                                                  |                                                         |                                                                                                                                                                                                                                                                                  |
|-----------------------------------|--------------------------------------------------|---------------------------------------------------------|----------------------------------------------------------------------------------------------------------------------------------------------------------------------------------------------------------------------------------------------------------------------------------|
|                                   |                                                  | Unknown [ <sup>14</sup> C <sub>4</sub> ] product 2 (11) | 322(32), 320(16), 314(13),<br>291(32), 289(14), 285(16),<br>276(19), 274(11), 259(13),<br>245(100), 243(42), 241(17),<br>239(39), 233(14), 231(13),<br>229(11), 203(20), 201(17),<br>199(11), 189(16), 187(18)                                                                   |
| <b><i>BjΔsdr</i><sub>GA</sub></b> | [ <sup>14</sup> C <sub>1</sub> ]GA <sub>12</sub> | [ <sup>14</sup> C <sub>1</sub> ]GA <sub>24</sub> (6)    | 344(20), 316(81), 312(28),<br>288(78), 287(50), 285(36),<br>284(36), 256(36), 229(68),<br>228(77), 227(100)                                                                                                                                                                      |
|                                   |                                                  | putative GA <sub>24</sub> norketone<br>(enolTMS)(29)    | M <sup>+</sup> 448(10), 348(19),<br>330(19), 320(85), 316(100),<br>305(10), 298(19), 288(70),<br>285(27), 284(28), 273(22),<br>271(19), 270(20), 260(27),<br>257(33), 256(76), 246(47),<br>245(40), 229(84), 228(63),<br>227(49), 213(22), 201(24),<br>187(41), 185(48), 168(54) |
|                                   |                                                  | GA <sub>9</sub> norketone (44)                          | 304(100), 301(14), 286(9),<br>272(32), 260(47), 258(21),<br>245(42), 244(34), 229(74),<br>228(98), 218(12), 217(14),<br>213(15), 201(44), 200(25),<br>199(27), 187(19), 185(86),<br>183(20), 159(33), 145(41)                                                                    |
|                                   |                                                  | GA <sub>12</sub> norketone (21)                         | M <sup>+</sup> 362(16), 334(20),<br>330(100), 315(8), 302(64),<br>287(29), 274(20), 271(25),<br>270(36), 259(46), 255(31),<br>243(69), 242(36), 227(33),<br>215(27), 201(35), 199(34),<br>173(15), 159(23), 145(22)                                                              |
| <b><i>BjΔfd</i><sub>GA</sub></b>  | <i>ent</i> -kaurenol                             | <i>ent</i> -kaurenoic acid (11)                         | M <sup>+</sup> 316(47), 301(43),<br>273(75), 257(100), 256(43),<br>241(72), 201(13), 187(22),<br>131(47), 121(85)                                                                                                                                                                |
|                                   |                                                  | <i>ent</i> -7 $\alpha$ -OH-kaurenoic acid (2)           | M <sup>+</sup> 404(40), 314(100),<br>299(31), 255(58), 254(43),<br>239(20)                                                                                                                                                                                                       |
|                                   |                                                  | 7-oxo-kaurenoic acid (72)                               | M <sup>+</sup> 330(53), 315(2), 298(6),<br>270(75), 255(29), 242(9),<br>227(6), 201(6), 199(6),<br>187(13), 175(15), 147(100)                                                                                                                                                    |

|                           |                                                                  |                                                                                                       |                                                                                                                                                                                                                                                              |
|---------------------------|------------------------------------------------------------------|-------------------------------------------------------------------------------------------------------|--------------------------------------------------------------------------------------------------------------------------------------------------------------------------------------------------------------------------------------------------------------|
|                           |                                                                  | 13-OH-kaurenoic acid (7)                                                                              | M <sup>+</sup> 404(27), 389(5), 345(4), 207(5), 193(100), 180(6), 165(9)                                                                                                                                                                                     |
| <b>BjΔfd<sub>GA</sub></b> | <i>ent</i> -[ <sup>14</sup> C <sub>1</sub> ]kaurenoic acid       | <i>ent</i> -7α-OH-[ <sup>14</sup> C <sub>1</sub> ]kaurenoic acid (10)                                 | M <sup>+</sup> 406(40), 391(12), 316(100), 301(30), 257(59), 256(46), 241(29)                                                                                                                                                                                |
|                           |                                                                  | [ <sup>14</sup> C <sub>1</sub> ]GA <sub>15</sub> (5)                                                  | M <sup>+</sup> 346(13), 314(18), 300(8), 286(39), 241(100), 195(20)                                                                                                                                                                                          |
|                           |                                                                  | 15-OH-[ <sup>14</sup> C <sub>1</sub> ]-kaurenoic acid (3)                                             | M <sup>+</sup> 406(9), 391(5), 316(5), 301(13), 274(12), 257(23), 241(10), 199(9), 197(10), 158(100)                                                                                                                                                         |
|                           |                                                                  | 7-oxo-[ <sup>14</sup> C <sub>1</sub> ] kaurenoic acid (60)                                            | M <sup>+</sup> 332(54), 300(6), 272(77), 257(28), 255(14), 244(8), 229(7), 203(6), 201(6), 189(5), 175(21), 149(100)                                                                                                                                         |
|                           |                                                                  | Putative 7-oxo-kaurenoic acid norketone (13)                                                          | M <sup>+</sup> 332(53), 300(12), 272(67), 257(13), 244(10), 217(9), 209(9), 203(9), 126(34), 121(21), 109(100)                                                                                                                                               |
|                           |                                                                  | 13-OH-[ <sup>14</sup> C <sub>1</sub> ]- kaurenoic acid (1)<br><i>Diluted with endogenous compound</i> | M <sup>+</sup> 406(30), 404(26), 391(6), 389(4), 348(9), 347(5), 277(2), 195(100), 193(82), 180(2)                                                                                                                                                           |
| <b>BjΔfd<sub>GA</sub></b> | <i>ent</i> -7α-OH-[ <sup>14</sup> C <sub>4</sub> ]kaurenoic acid | 7-oxo-[ <sup>14</sup> C <sub>4</sub> ] kaurenoic acid (39)                                            | M <sup>+</sup> 338(34), 336(41), 334(21), 330(8), 306(5), 304(6), 278(47), 276(60), 272(16), 270(13), 263(18), 261(29), 259(17), 233(9), 219(9), 205(11), 203(12), 181(13), 180(11), 179(16), 177(18), 175(18), 165(11), 163(14), 151(100), 149(82), 147(34) |
|                           |                                                                  | Putative 7-oxo-[ <sup>14</sup> C <sub>4</sub> ]kaurenoic acid norketone (4)                           | M <sup>+</sup> [340(36), 338(37), 336(23), 332(28)], 280(41), 278(63), 276(25), 272(37), 265(12), 263(13), 261(14), 221(16), 215(10), 213(14), 209(16), 169(31), 165(24), 140(35), 125(38), 121(26), 113(94), 111(90), 109(100)                              |

Putative dehydro-*ent*-7 $\alpha$ -OH-  
[<sup>14</sup>C<sub>4</sub>]kaurenoic acid (20) M<sup>+</sup> 410(79), 408(100),  
406(50), 404(25), 402(25),  
395(20), 393(26), 391(14),  
379(6), 377(5), 367(7),  
365(8), 351(17), 349(23),  
335(33), 333(43), 331(23),  
320(16), 318(14), 307(15),  
305(14), 293(24), 291(26),  
280(25), 278(54), 277(61),  
276(27), 275(46), 265(20),  
263(21), 247(27), 235(33),  
233(25)

*Plus other unidentified products  
– possibly norketones of the  
major products as the enol-  
TMS derivatives*

|                           |                                                            |                                                                            |                                                                                                                                                                                                                                                         |
|---------------------------|------------------------------------------------------------|----------------------------------------------------------------------------|---------------------------------------------------------------------------------------------------------------------------------------------------------------------------------------------------------------------------------------------------------|
| <b>BjΔ<sub>fd</sub>GA</b> | [ <sup>14</sup> C <sub>4</sub> ]GA <sub>12</sub> -aldehyde | [ <sup>14</sup> C <sub>4</sub> ]GA <sub>12</sub> (4)                       | 336(15), 334(8), 328(8),<br>308(100), 306(74), 304(13),<br>300(45), 293(14), 291(20),<br>247(29), 246(32), 245(21),<br>244(20), 231(14), 229(10)                                                                                                        |
|                           |                                                            | [ <sup>14</sup> C <sub>4</sub> ]GA <sub>15</sub> (3)                       | M <sup>+</sup> [352(11), 350(7), 344(2)],<br>320(16), 318(7), 306(6),<br>304(10), 290(40), 288(14),<br>245(100), 243(40), 239(32),<br>201(22), 199(10)                                                                                                  |
|                           |                                                            | [ <sup>14</sup> C <sub>4</sub> ]GA <sub>24</sub> (8)                       | 350(21), 348(18), 342(8),<br>322(69), 320(38), 318(27),<br>316(12), 314(19), 294(32),<br>293(55), 292(51), 291(37),<br>290(45), 286(17), 262(15),<br>261(18), 260(26), 233(58),<br>232(70), 231(100), 230(39),<br>229(41), 227(20), 226(23),<br>225(41) |
|                           |                                                            | [ <sup>14</sup> C <sub>4</sub> ]GA <sub>9</sub> (4)                        | M <sup>+</sup> 338(7), 306(83), 304(66),<br>298(35), 294(14), 292(18),<br>276(100), 274(44), 270(37),<br>251(62), 249(27), 243(26),<br>233(70), 232(79), 231(60),<br>230(53), 227(27), 226(37)                                                          |
|                           |                                                            | [ <sup>14</sup> C <sub>4</sub> ]GA <sub>9</sub> norketone (enolTMS)<br>(6) | M <sup>+</sup> [412(100), 410(60),<br>404(31)], 397(13), 381(5),<br>368(17), 367(26), 365(11),<br>351(37), 349(14), 345(18),<br>307(20), 305(14), 293(12),<br>257(13), 217(12), 215(17),<br>195(14), 161(12), 159(13),<br>147(25), 145(68), 143(38)     |

|                                                                                       |                                                                                                                                                                                                                                                                                                      |
|---------------------------------------------------------------------------------------|------------------------------------------------------------------------------------------------------------------------------------------------------------------------------------------------------------------------------------------------------------------------------------------------------|
| Putative [ <sup>14</sup> C <sub>4</sub> ]GA <sub>15</sub> norketone<br>(enolTMS) (2)  | M <sup>+</sup> [426(100), 424(62),<br>418(27)], 409(12), 403(15),<br>366(21), 365(32), 351(17),<br>349(18), 345(14), 305(16),<br>249(19), 247(14), 145(62),<br>143(53)                                                                                                                               |
| Putative [ <sup>14</sup> C <sub>4</sub> ]GA <sub>24</sub> norketone<br>(enolTMS) (16) | M <sup>+</sup> [456(15), 454(9), 448(3)],<br>441(5), 396(8), 366(9),<br>356(9), 338(8), 336(10),<br>328(36), 326(24), 324(42),<br>322(22), 320(19), 296(25),<br>294(30), 292(19), 262(27),<br>239(25), 235(33), 233(36),<br>225(19), 191(29), 170(100),<br>168(39), 145(38)                          |
| [ <sup>14</sup> C <sub>4</sub> ]GA <sub>12</sub> norketone (29)                       | M <sup>+</sup> 370(19), 368(11), 362(5),<br>342(22), 340(14), 338(100),<br>336(57), 330(29), 310(58),<br>308(39), 302(17), 295(21),<br>292(21), 279(26), 278(37),<br>276(24), 267(36), 265(31),<br>262(34), 261(26), 249(80),<br>248(43), 247(39), 243(21),<br>233(32), 221(28), 207(30),<br>205(46) |
| <hr/> <b>BjΔfd<sub>GA</sub></b> [ <sup>14</sup> C <sub>1</sub> ]GA <sub>12</sub>      | [ <sup>14</sup> C <sub>1</sub> ]GA <sub>12</sub> (33)                                                                                                                                                                                                                                                |
|                                                                                       | M <sup>+</sup> 362(0.5), 330(15),<br>302(100), 287(17), 271(6),<br>243(26), 242(20), 227(14),<br>187(7)                                                                                                                                                                                              |
|                                                                                       | GA <sub>12</sub> norketone (23)                                                                                                                                                                                                                                                                      |
|                                                                                       | M <sup>+</sup> 362(14), 334(20)<br>330(100), 302(58), 287(25),<br>274(16), 271(23), 270(29),<br>259(38), 255(27), 243(62),<br>242(29), 227(25), 215(23),<br>201(29), 199(26), 173(11),<br>159(17), 145(17)                                                                                           |
|                                                                                       | [ <sup>14</sup> C <sub>1</sub> ]GA <sub>15</sub> (10)                                                                                                                                                                                                                                                |
|                                                                                       | M <sup>+</sup> 346(16), 314(16),<br>300(12), 286(44), 241(100),<br>195(20)                                                                                                                                                                                                                           |
|                                                                                       | Putative GA <sub>15</sub> norketone<br>enolTMS (3)                                                                                                                                                                                                                                                   |
|                                                                                       | M <sup>+</sup> 418(100), 403(20),<br>387(6), 360(20), 359(25),<br>345(17), 301(10), 270(10),<br>243(19), 241(13), 238(8),<br>223(13), 197(10), 157(7),<br>143(44), 117(38)                                                                                                                           |

|                                                      |                                                                                                                                                                              |
|------------------------------------------------------|------------------------------------------------------------------------------------------------------------------------------------------------------------------------------|
| [ <sup>14</sup> C <sub>1</sub> ]GA <sub>24</sub> (7) | M <sup>+</sup> 376(3), 348(11), 344(34),<br>316(86), 312(32), 288(81),<br>287(60), 285(32), 284(38),<br>256(40), 229(76), 228(98),<br>227(100)                               |
| Putative GA <sub>24</sub> norketone<br>enoITMS (4)   | M <sup>+</sup> 448(15), 433(4), 419(4),<br>387(7), 360(10), 359(8),<br>327(4), 298(9), 271(8),<br>270(7), 238(23), 223(7),<br>221(10), 179(7), 168(100),<br>143(27), 117(10) |
| [ <sup>14</sup> C <sub>1</sub> ]GA <sub>9</sub> (3)  | M <sup>+</sup> 332(6), 300(100),<br>288(18), 272(95), 244(24),<br>243(57), 229(64), 228(74),<br>227(30), 218(22), 217(33),<br>213(18), 185(21), 183(23),<br>159(39)          |
| GA <sub>9</sub> norketone (enoITMS) (1)              | M <sup>+</sup> 404(100), 389(15),<br>373(7), 361(26), 360(14),<br>345(38), 301(18), 287(5),<br>270(7), 257(10), 243(10),<br>211(7), 183(4), 159(5),<br>143(46)               |

---

**Supplementary Table 4.** Products (methyl esters and TMS-ethers) identified by GC-MS from incubations of <sup>14</sup>C-labeled and unlabeled GA precursors with bacteroids of *S. fredii* SDR<sub>GA</sub> or Fd<sub>GA</sub> knock-out mutants.

| Mutant                     | Substrate                                                       | Product (% recovered products)                                                 | Mass spectrum of Me ester TMSi ether m/z (% relative abundance)                                                                            |
|----------------------------|-----------------------------------------------------------------|--------------------------------------------------------------------------------|--------------------------------------------------------------------------------------------------------------------------------------------|
| <i>SfΔsdr<sub>GA</sub></i> | <i>ent</i> -kaurenol                                            | <i>ent</i> -kaurenol (95)                                                      | M <sup>+</sup> 360(9), 345(9), 270(88), 257(100), 255(30), 241(16), 227(19), 201(17), 187(15), 175(24), 161(27), 147(27), 131(16), 123(77) |
|                            |                                                                 | <i>ent</i> -kaurenal (3)                                                       | M <sup>+</sup> 286(62), 271(19), 257(57), 252(17), 243(100), 225(36), 215(23), 199(38), 161(43)                                            |
|                            |                                                                 | <i>ent</i> -kaurenoic acid (2)                                                 | M <sup>+</sup> 316(50), 301(38), 273(67), 257(100), 256(45), 241(74), 201(15), 187(24), 131(41), 121(64)                                   |
|                            |                                                                 | <i>ent</i> -7 $\alpha$ -OH-kaurenoic acid (<1)                                 | M <sup>+</sup> 404(40), 314(100), 299(21), 255(64), 254(33), 239(25)                                                                       |
| <i>SfΔsdr<sub>GA</sub></i> | <i>ent</i> -[ <sup>14</sup> C <sub>1</sub> ]kaurenoic acid (KA) | <i>ent</i> -7 $\alpha$ -OH-[ <sup>14</sup> C <sub>1</sub> ]kaurenoic acid (18) | M <sup>+</sup> 406(39), 391(14), 316(100), 301(32), 257(56), 256(44), 241(29)                                                              |
|                            |                                                                 | [ <sup>14</sup> C <sub>1</sub> ]GA <sub>12</sub> (<1)                          | 330(28), 302(100), 287(49), 271(25), 243(65), 242(37), 227(4), 187(21)                                                                     |
|                            |                                                                 | 15-OH-[ <sup>14</sup> C <sub>1</sub> ]KA (7)                                   | M <sup>+</sup> 406(8), 391(7), 316(7), 301(21), 274(11), 257(36), 241(18), 199(7), 197(7), 158(100)                                        |
|                            |                                                                 | <i>ent</i> -[ <sup>14</sup> C <sub>1</sub> ]kaurenoic acid (56)                | M <sup>+</sup> 318(60), 303(45), 273(100), 259(99), 258(56), 257(52), 243(83), 213(39), 189(26), 121(93)                                   |
| <i>SfΔsdr<sub>GA</sub></i> | [ <sup>14</sup> C <sub>4</sub> ]GA <sub>12</sub> -aldehyde      | [ <sup>14</sup> C <sub>4</sub> ]GA <sub>12</sub> (17)                          | 336(16), 334(6), 328(11), 308(100), 306(62), 304(11), 302(9), 300(41), 293(5), 291(8), 246(26), 231(10), 229(15)                           |

|                            |                                                            |                                                                               |                                                                                                                                                                                           |
|----------------------------|------------------------------------------------------------|-------------------------------------------------------------------------------|-------------------------------------------------------------------------------------------------------------------------------------------------------------------------------------------|
|                            |                                                            | [ <sup>14</sup> C <sub>4</sub> ]GA <sub>12</sub> -aldehyde (60)               | M <sup>+</sup> 338(12), 336(6), 293(15), 291(7), 287(6), 278(47), 276(28), 270(14), 261(15), 259(6), 247(100), 245(65), 243(20), 241(31), 233(12), 231(9), 203(11)                        |
| <b>SfΔsdr<sub>GA</sub></b> | [ <sup>14</sup> C <sub>1</sub> ]GA <sub>12</sub>           | [ <sup>14</sup> C <sub>1</sub> ]GA <sub>15</sub> (33)                         | M <sup>+</sup> 346(17), 314(16), 300(13), 286(48), 241(100), 195(22)                                                                                                                      |
|                            |                                                            | [ <sup>14</sup> C <sub>1</sub> ]GA <sub>24</sub> (4)                          | 344(33), 316(82), 312(31), 288(83), 287(60), 285(51), 284(35), 256(39), 229(68), 228(84), 227(100)                                                                                        |
|                            |                                                            | [ <sup>14</sup> C <sub>1</sub> ]GA <sub>12</sub> (60)                         | M <sup>+</sup> 362(0.6), 330(17), 302(100), 287(18), 271(7), 243(29), 242(22), 227(16), 187(8)                                                                                            |
|                            |                                                            | GA <sub>12</sub> norketone (2)                                                | M <sup>+</sup> 362(22), 334(22), 330(100), 302(70), 287(30), 274(24), 271(20), 270(45), 259(45), 255(22), 243(76), 242(37), 227(28), 215(24), 201(32), 199(32), 173(11), 159(20), 145(22) |
| <b>SfΔfd<sub>GA</sub></b>  | <i>ent</i> -kaurenol                                       | <i>ent</i> -kaurenol (98)                                                     | M <sup>+</sup> 360(10), 345(9), 270(100), 257(83), 255(31), 241(17), 227(20), 201(18), 187(16), 175(26), 161(27), 147(27), 131(18), 123(81)                                               |
|                            |                                                            | <i>ent</i> -kaurenal (<1)                                                     | M <sup>+</sup> 286(59), 271(46), 257(45), 243(100), 225(38), 199(9), 161(21)                                                                                                              |
|                            |                                                            | <i>ent</i> -kaurenoic acid (1)                                                | M <sup>+</sup> 316(48), 301(38), 273(63), 257(100), 256(38), 241(68), 213(27), 201(12), 187(21), 131(31), 121(55)                                                                         |
| <b>SfΔfd<sub>GA</sub></b>  | <i>ent</i> -[ <sup>14</sup> C <sub>1</sub> ]kaurenoic acid | <i>ent</i> -7 $\alpha$ -OH-[ <sup>14</sup> C <sub>1</sub> ]kaurenoic acid (2) | M <sup>+</sup> 406(68), 316(100), 301(49), 257(29), 256(31), 241(36)                                                                                                                      |
|                            |                                                            | 15-OH-[ <sup>14</sup> C <sub>1</sub> ]-KA (13)                                | M <sup>+</sup> 406(7), 391(5), 316(5), 301(17), 274(12), 257(34), 241(16), 199(10), 197(11), 158(100)                                                                                     |
|                            |                                                            | <i>ent</i> -[ <sup>14</sup> C <sub>1</sub> ]kaurenoic acid (60)               | M <sup>+</sup> 318(65), 303(44), 273(99), 259(100), 258(60), 257(48), 243(79), 213(40), 189(25), 121(83)                                                                                  |

|                           |                                                                               |                                                                                   |                                                                                                                                                                                                                                                  |
|---------------------------|-------------------------------------------------------------------------------|-----------------------------------------------------------------------------------|--------------------------------------------------------------------------------------------------------------------------------------------------------------------------------------------------------------------------------------------------|
| <b>SfΔfd<sub>GA</sub></b> | <i>ent</i> -7 $\alpha$ -OH-<br>[ <sup>14</sup> C <sub>4</sub> ]kaurenoic acid | <i>ent</i> -7 $\alpha$ -OH [ <sup>14</sup> C <sub>4</sub> ]kaurenoic acid<br>(81) | M <sup>+</sup> 412(43), 410(46),<br>408(20), 397(15), 395(16),<br>322(87), 320(100), 318(45),<br>307(35), 305(37), 303(18),<br>278(10), 26350, 262(48),<br>261(60), 260(52), 259(33),<br>258(21), 247(38), 245(38),<br>239(25), 227(30), 189(34) |
|                           |                                                                               | [ <sup>14</sup> C <sub>4</sub> ]GA <sub>12</sub> (8)                              | 336(11), 334(7), 328(11),<br>308(100), 306(78), 304(7),<br>300(52), 293(6), 291(8),<br>247(45), 246(42), 231(35)                                                                                                                                 |
| <b>SfΔfd<sub>GA</sub></b> | [ <sup>14</sup> C <sub>4</sub> ]GA <sub>12</sub> -aldehyde                    | [ <sup>14</sup> C <sub>4</sub> ]GA <sub>12</sub> (63)                             | 336(26), 334(20), 308(96),<br>306(100), 304(29), 300(90),<br>293(23), 291(23), 247(88),<br>246(67), 244(48), 231(78),<br>229(15)                                                                                                                 |
|                           |                                                                               | [ <sup>14</sup> C <sub>4</sub> ]GA <sub>15</sub> (37)                             | M <sup>+</sup> 352(13), 350(8), 320(24),<br>312(15), 306(15), 290(73),<br>288(27), 245(100), 243(93),<br>239(83), 201(72), 199(44)                                                                                                               |
| <b>SfΔfd<sub>GA</sub></b> | [ <sup>14</sup> C <sub>1</sub> ]GA <sub>12</sub>                              | [ <sup>14</sup> C <sub>1</sub> ]GA <sub>12</sub> (78)                             | 330(19), 302(100), 300(24),<br>287(46), 271(27), 243(57),<br>242(56), 227(37), 187(31)                                                                                                                                                           |
|                           |                                                                               | [ <sup>14</sup> C <sub>1</sub> ]GA <sub>15</sub> (22)                             | M <sup>+</sup> 346(6), 314(20), 300(14),<br>286(44), 241(100), 195(31)                                                                                                                                                                           |



**Supplementary Table 5.** Comprehensive examination of enzyme functionality with GA pathway intermediates. +, viable substrate; -, non-viable substrate; **P**, product formed; n.t., not tested. Note that some intermediates are both products and viable substrates.

|                                               | CYP117    | CYP114    | CYP114-Fd <sub>GA</sub> | SDR <sub>GA</sub> | CYP112    |
|-----------------------------------------------|-----------|-----------|-------------------------|-------------------|-----------|
| <i>ent</i> -kaurene (1)                       | <b>+</b>  | -         | -                       | -                 | -         |
| <i>ent</i> -kaurenol (2)                      | <b>+P</b> | -         | -                       | -                 | -         |
| <i>ent</i> -kaurenal (3)                      | <b>+P</b> | -         | -                       | -                 | -         |
| <i>ent</i> -kaurenoic acid (4) <sup>‡</sup>   | <b>-P</b> | <b>+</b>  | <b>+</b>                | -                 | -         |
| <i>ent</i> -7 $\alpha$ -OH-kaurenoic acid (5) | -         | <b>-P</b> | <b>-P</b>               | -                 | -         |
| GA <sub>12</sub> -aldehyde (6)                | -         | -         | <b>+P</b>               | <b>+</b>          | -         |
| GA <sub>12</sub> (7)                          | -         | -         | <b>-P</b>               | <b>-P</b>         | <b>+</b>  |
| GA <sub>15</sub> (8)                          | -         | -         | -                       | -                 | <b>+P</b> |
| GA <sub>24</sub> (9)                          | -         | -         | -                       | -                 | <b>+P</b> |
| GA <sub>9</sub> (10)                          | -         | -         | -                       | -                 | <b>-P</b> |

<sup>‡</sup>methyl ester derivative was also tested with CYP114 +/-Fd<sub>GA</sub> with no turnover detected.

**Supplementary Table 6.** Identity between plant, fungal, and bacterial cytochromes P450 involved in GA biosynthesis. Representative protein sequences from *B. japonicum* USDA110, *Arabidopsis thaliana*, and *Gibberella fujikuroi* were compared using pairwise alignments.

|                          | BjCYP117 | BjCYP114 | BjCYP112 | AtKO (CYP701) | AtKAO1 (CYP88) | AtKAO2 (CYP88) | GfKO (CYP503) | GfKAO (CYP68A) | GfGA20ox (CYP68B) |
|--------------------------|----------|----------|----------|---------------|----------------|----------------|---------------|----------------|-------------------|
| <b>BjCYP117</b>          | -        |          |          |               |                |                |               |                |                   |
| <b>BjCYP114</b>          | 22.9     | -        |          |               |                |                |               |                |                   |
| <b>BjCYP112</b>          | 19.8     | 27       | -        |               |                |                |               |                |                   |
| <b>AtKO (CYP701)</b>     | 18.2     | 16.4     | 16.6     | -             |                |                |               |                |                   |
| <b>AtKAO1 (CYP88)</b>    | 19       | 21.8     | 19.5     | 19.7          | -              |                |               |                |                   |
| <b>AtKAO2 (CYP88)</b>    | 16.2     | 17.5     | 18.6     | 19.7          | 76.2           | -              |               |                |                   |
| <b>GfKO (CYP503)</b>     | 16.4     | 19.5     | 17.2     | 18.2          | 17.4           | 16.8           | -             |                |                   |
| <b>GfKAO (CYP68A)</b>    | 15.3     | 13.1     | 17.6     | 17.3          | 20.7           | 20.7           | 28            | -              |                   |
| <b>GfGA20ox (CYP68B)</b> | 14.3     | 13.6     | 17.2     | 21.4          | 20.9           | 19.2           | 27.7          | 37.4           | -                 |

**Supplementary Table 7.** List of prominent strains, plasmids, and constructs used in experiments.

| Strain, plasmid, construct                                                                          | Description                                                                                                                                                                                                                              | Reference or Source      |
|-----------------------------------------------------------------------------------------------------|------------------------------------------------------------------------------------------------------------------------------------------------------------------------------------------------------------------------------------------|--------------------------|
| <i>Bacterial Strains</i>                                                                            |                                                                                                                                                                                                                                          |                          |
| One Shot® TOP10 Chemically Competent <i>E. coli</i>                                                 | F- <i>mcrA</i> Δ ( <i>mrr-hsdRMS-mcrBC</i> )<br>Φ80 <i>lacZ</i> Δ <i>M15</i> Δ <i>lacX74 recA1 araD139</i><br>Δ( <i>araleu</i> )7697 <i>galU galK rpsL</i><br>( <i>StrR</i> ) <i>endA1 nupG</i> ; for plasmid propagation<br>and cloning | Thermo Fisher Scientific |
| OverExpress™ C41(DE3) Chemically Competent <i>E. coli</i>                                           | F- <i>ompT hsdSB (rB- mB-) gal dcm</i> (DE3); for<br>pCDF-BjSDR/Fd expression                                                                                                                                                            | Lucigen                  |
| One Shot® BL21 Star™ (DE3) Chemically Competent <i>E. coli</i>                                      | F- <i>ompT hsdSB (rB-, mB-) gal dcmrne131</i><br>(DE3); for pET101-BjCYP114 and pCDF-<br>FdR <sub>x</sub> /Fd coexpression                                                                                                               | Thermo Fisher Scientific |
| C41 pCDF-BjSDR/Fd                                                                                   | <i>E. coli</i> C41 cells transformed for expression of<br><i>B. japonicum</i> USDA110 SDR <sub>GA</sub> expression;<br>Sp <sup>R</sup>                                                                                                   | This study               |
| BL21 pET101-BjCYP114                                                                                | <i>E. coli</i> BL21 cells transformed for expression<br>of <i>B. japonicum</i> USDA110 CYP114                                                                                                                                            | This study               |
| BL21 pET101-BjCYP114+pCDF-FdR <sub>x</sub> /Fd                                                      | <i>E. coli</i> BL21 cells transformed for<br>coexpression of <i>B. japonicum</i> USDA110<br>CYP114, Fd <sub>GA</sub> , and FdR1-5                                                                                                        | This study               |
| <i>E. coli</i> MM294A                                                                               | <i>pro-82 thi-1 endA hsdR17 supE44</i> ; donor<br>strains for triparental mating                                                                                                                                                         | 51                       |
| <i>E. coli</i> MT616                                                                                | MM294A <i>recA56</i> carrying plasmid pRK600,<br>Cm <sup>R</sup> ; helper strains for triparental mating                                                                                                                                 | 52                       |
| <i>Sinorhizobium meliloti</i> 1021 (a.k.a. <i>Ensifer meliloti</i> 1021, <i>S. meliloti</i> Rm1021) | Rhizobial symbiont of <i>Medicago spp.</i> ; Sm <sup>R</sup> ;<br>heterologous host for expression of <i>S. fredii</i><br>GA operon genes                                                                                                | 46                       |
| Sm1021 pstb-LAFR5-SfCYP117                                                                          | <i>S. meliloti</i> 1021 transformed for expression of<br><i>S. fredii</i> NGR234 CYP117; Sm <sup>R</sup> , Tc <sup>R</sup>                                                                                                               | This study               |
| Sm1021 pstb-LAFR5-SfCYP117-Fd                                                                       | <i>S. meliloti</i> 1021 transformed for coexpression<br>of <i>S. fredii</i> NGR234 CYP117 and Fd <sub>GA</sub> ; Sm <sup>R</sup> ,<br>Tc <sup>R</sup>                                                                                    | This study               |
| Sm1021 pstb-LAFR5-SfCYP114                                                                          | <i>S. meliloti</i> 1021 transformed for expression of<br><i>S. fredii</i> NGR234 CYP114; Sm <sup>R</sup> , Tc <sup>R</sup>                                                                                                               | This study               |
| Sm1021 pstb-LAFR5-SfCYP114-Fd                                                                       | <i>S. meliloti</i> 1021 transformed for coexpression<br>of <i>S. fredii</i> NGR234 CYP114 and Fd <sub>GA</sub> ; Sm <sup>R</sup> ,<br>Tc <sup>R</sup>                                                                                    | This study               |

|                                                                                   |                                                                                                                                                 |                      |
|-----------------------------------------------------------------------------------|-------------------------------------------------------------------------------------------------------------------------------------------------|----------------------|
| <i>Sm1021 pstb-LAFR5-SfSDR</i>                                                    | <i>S. meliloti</i> 1021 transformed for expression of <i>S. fredii</i> NGR234 SDR <sub>GA</sub> ; Sm <sup>R</sup> , Tc <sup>R</sup>             | This study           |
| <i>Sm1021 pstb-LAFR5-SfCYP112</i>                                                 | <i>S. meliloti</i> 1021 transformed for expression of <i>S. fredii</i> NGR234 CYP112; Sm <sup>R</sup> ; Tc <sup>R</sup>                         | This study           |
| <i>Sm1021 pstb-LAFR5-SfCYP112-Fd</i>                                              | <i>S. meliloti</i> 1021 transformed for coexpression of <i>S. fredii</i> NGR234 CYP112 and Fd <sub>GA</sub> ; Sm <sup>R</sup> , Tc <sup>R</sup> | This study           |
| <i>Bradyrhizobium japonicum</i> USDA110 (a.k.a. <i>B. diazoefficiens</i> USDA110) | wild-type rhizobial symbiont of <i>Glycine max</i> ; Cm <sup>R</sup>                                                                            | USDA; Beltsville, MD |
| <i>BjΔcyp117</i>                                                                  | deletion strain of CYP117 derived from <i>B. japonicum</i> USDA110 parent strain; Cm <sup>R</sup>                                               | This study           |
| <i>BjΔcyp114</i>                                                                  | deletion strain of CYP114 derived from <i>B. japonicum</i> USDA110 parent strain; Cm <sup>R</sup>                                               | This study           |
| <i>BjΔfd<sub>GA</sub></i>                                                         | deletion strain of Fd <sub>GA</sub> derived from <i>B. japonicum</i> USDA110 parent strain; Cm <sup>R</sup>                                     | This study           |
| <i>BjΔsdr<sub>GA</sub></i>                                                        | deletion strain of SDR <sub>GA</sub> derived from <i>B. japonicum</i> USDA110 parent strain; Cm <sup>R</sup>                                    | This study           |
| <i>BjΔcyp112</i>                                                                  | deletion strain of CYP112 derived from <i>B. japonicum</i> USDA110 parent strain; Cm <sup>R</sup>                                               | This study           |
| <i>Sinorhizobium fredii</i> NGR234 (a.k.a. <i>Ensifer fredii</i> NGR234)          | widely nodulating wild-type rhizobial symbiont of <i>Vigna unguiculata</i> , among others; Rf <sup>R</sup>                                      | 47                   |
| <i>SfΔcyp117</i>                                                                  | deletion strain of CYP117 derived from <i>S. fredii</i> NGR234 parent strain; Rf <sup>R</sup>                                                   | This study           |
| <i>SfΔcyp114</i>                                                                  | deletion strain of CYP114 derived from <i>S. fredii</i> NGR234 parent strain; Rf <sup>R</sup>                                                   | This study           |
| <i>SfΔfd<sub>GA</sub></i>                                                         | deletion strain of Fd <sub>GA</sub> derived from <i>S. fredii</i> NGR234 parent strain; Rf <sup>R</sup>                                         | This study           |
| <i>SfΔsdr<sub>GA</sub></i>                                                        | deletion strain of SDR <sub>GA</sub> derived from <i>S. fredii</i> NGR234 parent strain; Rf <sup>R</sup>                                        | This study           |
| <i>SfΔcyp112</i>                                                                  | deletion strain of CYP112 derived from <i>S. fredii</i> NGR234 parent strain; Rf <sup>R</sup>                                                   | This study           |

Plasmids

|                     |                                                                                                                                                                    |                          |
|---------------------|--------------------------------------------------------------------------------------------------------------------------------------------------------------------|--------------------------|
| pCR™-Blunt II-TOPO® | Km <sup>R</sup> ; for cloning and propagation of constructs                                                                                                        | Thermo Fisher Scientific |
| pCDF-Duet™-1        | Sp <sup>R</sup> ; for expression in C41 <i>E. coli</i> cells                                                                                                       | Novagen (EMD Millipore)  |
| pstb-LAFR5          | pLAFR5 with the SMb21651 promoter sequence; Broad-range-host cosmid expression vector shown to be functional in <i>S. meliloti</i> 1021; mob+; Tc <sup>R</sup>     | 50                       |
| pK19mobsacB         | Suicide vector containing the sacB gene for negative selection; mob+; Km <sup>R</sup> ; for double cross-over homologous recombination deletion of bacterial genes | 23                       |

Expression Constructs

|                        |                                                                                                                          |            |
|------------------------|--------------------------------------------------------------------------------------------------------------------------|------------|
| pstb-LAFR5-SfCYP117    | For expression of SfCYP117 in <i>S. meliloti</i> 1021; Tc <sup>R</sup>                                                   | This study |
| pstb-LAFR5-SfCYP117-Fd | For coexpression of SfCYP117 and SfFd <sub>GA</sub> in <i>S. meliloti</i> 1021; Tc <sup>R</sup>                          | This study |
| pstb-LAFR5-SfCYP114    | For expression of SfCYP114 in <i>S. meliloti</i> 1021; Tc <sup>R</sup>                                                   | This study |
| pstb-LAFR5-SfCYP114-Fd | For coexpression of SfCYP114 and SfFd <sub>GA</sub> in <i>S. meliloti</i> 1021; Tc <sup>R</sup>                          | This study |
| pstb-LAFR5-SfSDR       | For expression of SfSDR <sub>GA</sub> in <i>S. meliloti</i> 1021; Tc <sup>R</sup>                                        | This study |
| pstb-LAFR5-SfCYP112    | For expression of SfCYP112 in <i>S. meliloti</i> 1021; Tc <sup>R</sup>                                                   | This study |
| pstb-LAFR5-SfCYP112-Fd | For coexpression of SfCYP112 and SfFd <sub>GA</sub> in <i>S. meliloti</i> 1021; Tc <sup>R</sup>                          | This study |
| pET101-BjCYP114        | For expression of BjCYP114 in BL21 <i>E. coli</i> cells; Cb <sup>R</sup>                                                 | This study |
| pCDF-BjSDR/Fd          | For expression of BjSDR <sub>GA</sub> in C41 <i>E. coli</i> cells; Sp <sup>R</sup>                                       | This study |
| pCDF-BjFdR1/Fd         | For coexpression of <i>B. japonicum</i> USDA110 Fd <sub>GA</sub> with FdR1 in BL21 <i>E. coli</i> cells; Sp <sup>R</sup> | This study |

|                |                                                                                                                          |            |
|----------------|--------------------------------------------------------------------------------------------------------------------------|------------|
| pCDF-BjFdR2/Fd | For coexpression of <i>B. japonicum</i> USDA110 Fd <sub>GA</sub> with FdR2 in BL21 <i>E. coli</i> cells; Sp <sup>R</sup> | This study |
| pCDF-BjFdR3/Fd | For coexpression of <i>B. japonicum</i> USDA110 Fd <sub>GA</sub> with FdR3 in BL21 <i>E. coli</i> cells; Sp <sup>R</sup> | This study |
| pCDF-BjFdR4/Fd | For coexpression of <i>B. japonicum</i> USDA110 Fd <sub>GA</sub> with FdR4 in BL21 <i>E. coli</i> cells; Sp <sup>R</sup> | This study |
| pCDF-BjFdR5/Fd | For coexpression of <i>B. japonicum</i> USDA110 Fd <sub>GA</sub> with FdR5 in BL21 <i>E. coli</i> cells; Sp <sup>R</sup> | This study |

Deletion constructs

|                                                 |                                                                                                                                                                                      |            |
|-------------------------------------------------|--------------------------------------------------------------------------------------------------------------------------------------------------------------------------------------|------------|
| pK19 <i>mobsacB</i> -BjCYP117-AB/CD             | Construct containing a fused DNA fragment of regions upstream (AB) and downstream (CD) of BjCYP117 for clean deletion of the gene through double homologous recombination            | This study |
| pK19 <i>mobsacB</i> -BjCYP114-AB/CD             | Construct containing a fused DNA fragment of regions upstream (AB) and downstream (CD) of BjCYP114 for clean deletion of the gene through double homologous recombination            | This study |
| pK19 <i>mobsacB</i> -BjSDR <sub>GA</sub> -AB/CD | Construct containing a fused DNA fragment of regions upstream (AB) and downstream (CD) of BjSDR <sub>GA</sub> for clean deletion of the gene through double homologous recombination | This study |
| pK19 <i>mobsacB</i> -BjFd <sub>GA</sub> -AB/CD  | Construct containing a fused DNA fragment of regions upstream (AB) and downstream (CD) of BjFd <sub>GA</sub> for clean deletion of the gene through double homologous recombination  | This study |
| pK19 <i>mobsacB</i> -BjCYP112-AB/CD             | Construct containing a fused DNA fragment of regions upstream (AB) and downstream (CD) of BjCYP112 for clean deletion of the gene through double homologous recombination            | This study |
| pK19 <i>mobsacB</i> -SfCYP117-AB/CD             | Construct containing a fused DNA fragment of regions upstream (AB) and downstream (CD) of SfCYP117 for clean deletion of the gene through double homologous recombination            | This study |
| pK19 <i>mobsacB</i> -SfCYP114-AB/CD             | Construct containing a fused DNA fragment of regions upstream (AB) and downstream (CD) of SfCYP114 for clean deletion of the gene through double homologous recombination            | This study |
| pK19 <i>mobsacB</i> -SfSDR <sub>GA</sub> -AB/CD | Construct containing a fused DNA fragment of regions upstream (AB) and downstream (CD) of SfSDR <sub>GA</sub> for clean deletion of the gene through double homologous recombination | This study |
| pK19 <i>mobsacB</i> -SfFd <sub>GA</sub> -AB/CD  | Construct containing a fused DNA fragment of regions upstream (AB) and downstream (CD) of SfFd <sub>GA</sub> for clean deletion of the gene through double homologous recombination  | This study |
| pK19 <i>mobsacB</i> -SfCYP112-AB/CD             | Construct containing a fused DNA fragment of regions upstream (AB) and downstream (CD) of SfCYP112 for clean deletion of the gene through double homologous recombination            | This study |

**Supplementary Table 8.** Primers used to create expression constructs and deletion bacteroid strains. Bj=*Bradyrhizobium japonicum*; Sf=*Sinorhizobium fredii*. Red=restriction site within primer for cloning. Bold=overlap region for fusing together DNA fragments.

| Name                         | Sequence (5' to 3')                                                             | Description                                                                                                                                                                                |
|------------------------------|---------------------------------------------------------------------------------|--------------------------------------------------------------------------------------------------------------------------------------------------------------------------------------------|
| <u>Expression constructs</u> |                                                                                 |                                                                                                                                                                                            |
| Sf-sCYP117/sCYP112-F         | CGC <b>GGATCC</b> TAACGTAACGTAA<br>ATGGAGTCACCTCT                               | Forward primer to amplify sCYP117/sCYP112 and sCYP117-Fd/sCYP112-Fd; anneals to 5' linker and BamHI which are located in both synthetic constructs, allowing for use of this single primer |
| Sf-Fd <sub>GA</sub> -R       | CCG <b>GAATTC</b> TCAAACCGTTCCAT<br>CGTGTCTCCTGG                                | Reverse primer to amplify sCYP117-Fd, CYP114-Fd, and sCYP112-Fd; contains EcoRI                                                                                                            |
| Sf-sCYP117-R                 | CCG <b>GAATTC</b> TCATGAGAATCCG<br>ATGCGGATTGTCAT                               | Reverse primer to amplify sCYP117; contains EcoRI                                                                                                                                          |
| Sf-CYP114-ORF-F              | CACCATGGACATGCAAGAAACC<br>ACGACA                                                | Forward primer to amplify the ORF of CYP114 and combined CYP114-Fd amplicon from gDNA; contains CACC for use in pENTR                                                                      |
| Sf-CYP114-ORF-R              | CTACGGTTGCGCCCTGCGATCA<br>GTCG                                                  | Reverse primer to amplify the ORF of CYP114                                                                                                                                                |
| Sf-CYP114-ORF-linker-F       | CGC <b>GGATCC</b> TAACGTAACGTAA<br>ATGGAGTCACCTCTATGGACAT<br>GCAAGAAACCACGACAGC | Forward primer to add BamHI and the 5' linker sequence to the CYP114 construct                                                                                                             |
| Sf-CYP114-ORF-EcoRI-R        | CCG <b>GAATTC</b> CTACGGTTGCGCC<br>CTGCGATCAGTCG                                | Reverse primer to add EcoRI onto the 3' end of the CYP114 construct                                                                                                                        |
| Sf-sCYP112-R                 | CCG <b>GAATTC</b> TCACCAGAGCACC<br>GGAACTCCTCGA                                 | Reverse primer to amplify sCYP112; contains EcoRI                                                                                                                                          |
| Sf-SDR-ORF-F                 | ATGGAACGGTTTGAAGGCAAGG<br>TGGCCG                                                | Forward primer to amplify ORF of SDR from gDNA                                                                                                                                             |
| Sf-SDR-ORF-R                 | TCAGCAGCGCGCCGTTTCGGCG<br>GTGTC                                                 | Reverse primer to amplify ORF of SDR from gDNA                                                                                                                                             |
| Sf-SDR-linker-F1             | AATGGAGTCACCTCTATGGAAC<br>GGTTTGAAGGCAAGGTGG                                    | Forward primer to add 15 bp of linker sequence to the 5' end of SDR construct                                                                                                              |
| Sf-SDR-EcoRI-R               | CCG <b>GAATTC</b> TCAGCAGCGCGCC<br>GTTTCGGCG                                    | Reverse primer to add EcoRI onto the 3' end of the SDR construct                                                                                                                           |
| Sf-SDR-linker-F2             | CGC <b>GGATCC</b> TAACGTAACGTAA<br>ATGGAGTCACCTCT                               | Forward primer used to add the remainder of the linker sequence and a 5' BamHI site to the SDR construct                                                                                   |
| <u>Knockout constructs</u>   |                                                                                 |                                                                                                                                                                                            |
| Bj-CYP117ko-A-F              | CATG <b>GAATTC</b> AACCGGACGGCG<br>TGGCCGAAGTGTG                                | Forward primer to amplify a ~1kb region upstream of CYP117 (AB fragment); contains 5' EcoRI                                                                                                |
| Bj-CYP117ko-B-R              | <b>CACACGGGGCATGCGATGCCA</b><br><b>GCCAGCAGCGCGCGCCGCGT</b><br>CCGCTTC          | Reverse primer to amplify ~1kb region upstream of CYP117 (AB fragment); contains overlap region for annealing/fusing to CD fragment                                                        |
| Bj-CYP117ko-C-F              | <b>GCGGACGCGGCGCCGCGCTGC</b><br><b>TGGCTGGCATCGCATGCCCGT</b><br>GTGGTG          | Forward primer to amplify a ~1kb region downstream of CYP117 (CD fragment); contains overlap region for annealing/fusing to AB fragment                                                    |
| Bj-CYP117ko-D-R              | CATG <b>AAGCTT</b> CATGCGCGTGG<br>CGCGTGTGTTGAAC                                | Reverse primer to amplify ~1kb region downstream of CYP117 (CD fragment); contains HindIII                                                                                                 |
| Bj-CYP117ko-check-F          | ATCGTCAACATGTGCTCGTGCC<br>AGG                                                   | Forward primer ~400bp upstream to check for presence or deletion of CYP117; wild-type fragment=2.1 kb, knockout=0.8 kb                                                                     |

|                                 |                                                            |                                                                                                                                                      |
|---------------------------------|------------------------------------------------------------|------------------------------------------------------------------------------------------------------------------------------------------------------|
| Bj-CYP117ko-check-R             | TGCGCCGGCAGCCAAACAGAGC<br>AAG                              | Reverse primer ~400 bp downstream to check for presence or deletion of CYP117; wild-type fragment=2.1 kb, knockout=0.8 kb                            |
| Bj-CYP114ko-A-F                 | GCGAATTCGTCCCTGGTGCACA<br>AGGCGGTAGAG                      | Forward primer to amplify ~500bp region upstream of CYP117 (AB fragment); contains 5' EcoRI                                                          |
| Bj-CYP114ko-B-R                 | ACGCGCATCCCTGGTTACCTGT<br>TGGCGGGCTG                       | Reverse primer to amplify ~500bp region upstream of CYP114 (AB fragment); contains overlap region for annealing/fusing to CD fragment                |
| Bj-CYP114ko-C-F                 | GTAACCAGGGATGCGCGTCATG<br>GTGCAC                           | Forward primer to amplify a ~500bp region downstream of CYP114 (CD fragment); contains overlap region for annealing/fusing to AB fragment            |
| Bj-CYP114ko-D-R                 | ACTAAGCTTCTGCGCATCGGCG<br>ATGTGCAT                         | Reverse primer to amplify ~500bp region downstream of CYP117 (CD fragment); contains HindIII                                                         |
| Bj-CYP114ko-check-F             | ATTCCCGCGGAGAGCAAGGTGC<br>TGG                              | Forward primer ~400bp upstream to check for presence or deletion of CYP114; wild-type fragment=2.2 kb, knockout=0.8 kb                               |
| Bj-CYP114ko-check-R             | ATAGCCGCCGAGCCATCAATGT<br>CGGC                             | Reverse primer ~400bp downstream to check for presence or deletion of CYP114; wild-type fragment=2.2 kb, knockout=0.8 kb                             |
| Bj-Fd <sub>GA</sub> ko-A-F      | ACCGAGAATTCATACAGCGC<br>AAGCGCACCGATCC                     | Forward primer to amplify ~600bp region upstream of Fd <sub>GA</sub> (AB fragment); contains 5' EcoRI                                                |
| Bj-Fd <sub>GA</sub> ko-B-R      | TGCCTTCAAACCGTCCCATCGA<br>ACGTCCGAAGGAATGCCGAGG            | Reverse primer to amplify ~600bp region upstream of Fd <sub>GA</sub> (AB fragment); contains overlap region for annealing/fusing to CD fragment      |
| Bj-Fd <sub>GA</sub> ko-C-F      | CGGCATTCTTCGGACGTTTGA<br>TGGGACGGTTTGAAGGCAAAGT<br>GG      | Forward primer to amplify a ~800bp region downstream of Fd <sub>GA</sub> (CD fragment); contains overlap region for annealing/fusing to AB fragment  |
| Bj-Fd <sub>GA</sub> ko-D-R      | TCGGAGAATTCGTTGCCACC<br>GTCGGCGTATGTCCG                    | Reverse primer to amplify ~800bp region downstream of Fd <sub>GA</sub> (CD fragment); contains EcoRI                                                 |
| Bj-Fd <sub>GA</sub> ko-check-F  | TCGAAGAAGTCCTGCGCTGCGA<br>CGC                              | Forward primer ~400bp upstream to check for presence or deletion of Fd <sub>GA</sub> ; wild-type fragment=1.1 kb, knockout=0.8 kb                    |
| Bj-Fd <sub>GA</sub> ko-check-R  | ATGTTGACGATCGCGCCACCGC<br>CGC                              | Reverse primer ~400bp downstream to check for presence or deletion of Fd <sub>GA</sub> ; wild-type fragment=1.1 kb, knockout=0.8 kb                  |
| Bj-SDR <sub>GA</sub> ko-A-F     | ACCGTGAATTCATCGCCAGC<br>GCGACATCGAACTGG                    | Forward primer to amplify ~600bp region upstream of SDR <sub>GA</sub> (AB fragment); contains 5' EcoRI                                               |
| Bj-SDR <sub>GA</sub> ko-B-R     | CAGCGGGTTGAGCAGCATGTC<br>CACGTGTCATCCTAGATTGTGCT<br>GGTC   | Reverse primer to amplify ~600bp region upstream of SDR <sub>GA</sub> (AB fragment); contains overlap region for annealing/fusing to CD fragment     |
| Bj-SDR <sub>GA</sub> ko-C-F     | CCAGCACAATCTAGGATGACAC<br>GTGGACATGCTGCTCAACCCGC<br>TGAACC | Forward primer to amplify a ~700bp region downstream of SDR <sub>GA</sub> (CD fragment); contains overlap region for annealing/fusing to AB fragment |
| Bj-SDR <sub>GA</sub> ko-D-R     | GAATTCGTCGCTGCGATCGA<br>AGGCGCTCACC                        | Reverse primer to amplify ~700bp region downstream of SDR <sub>GA</sub> (CD fragment); contains BamHI                                                |
| Bj-SDR <sub>GA</sub> ko-check-F | TCACTTCTGCCTCGGTGCGCAA<br>CTG                              | Forward primer ~400bp upstream to check for presence or deletion of SDR <sub>GA</sub> ; wild-type fragment=1.7 kb, knockout=0.8 kb                   |
| Bj-SDR <sub>GA</sub> ko-check-R | TAGATCGCCGGTTTCGCGCAGG<br>ATG                              | Reverse primer ~400bp downstream to check for presence or deletion of SDR <sub>GA</sub> ; wild-type fragment=1.7 kb, knockout=0.8 kb                 |
| Bj-CYP112ko-A-F                 | GCGGATCCGCACATTCAGCGCG<br>AGAGCAGG                         | Forward primer to amplify ~500bp region upstream of CYP112 (AB fragment); contains 5' BamHI                                                          |

|                            |                                                                   |                                                                                                                                                   |
|----------------------------|-------------------------------------------------------------------|---------------------------------------------------------------------------------------------------------------------------------------------------|
| Bj-CYP112ko-B-R            | <b>CGCGACAGGTGGCACTTCACTC</b><br>TCTAAG                           | Reverse primer to amplify ~500bp region upstream of CYP112 (AB fragment); contains overlap region for annealing/fusing to CD fragment             |
| Bj-CYP112ko-C-F            | <b>GAAGTGCCACCTGTGCGGGAC</b><br>GCCACG                            | Forward primer to amplify a ~500bp region downstream of CYP112 (CD fragment); contains overlap region for annealing/fusing to AB fragment         |
| Bj-CYP112ko-D-R            | ACT <b>AAGCTT</b> TGCCGTCCAGGCG<br>CGCTG                          | Reverse primer to amplify ~500bp region downstream of CYP112 (CD fragment); contains HindIII                                                      |
| Bj-CYP112ko-check-F        | AGCTATGTAGTGCCTGCTGAGC<br>CTGC                                    | Forward primer ~400bp upstream to check for presence or deletion of CYP112; wild-type fragment=2.0 kb, knockout=0.8 kb                            |
| Bj-CYP112ko-check-R        | TATGCGTCGGTGGGTCCTTCAT<br>CGC                                     | Reverse primer ~400bp downstream to check for presence or deletion of CYP112; wild-type fragment=2.0 kb, knockout=0.8 kb                          |
| Sf-CYP117ko-A-F            | ATA <b>GGATCC</b> CAGACCATGGCG<br>ACCAATCTGCGCG                   | Forward primer to amplify a ~1kb region upstream of CYP117 (AB fragment); contains 5' BamHI                                                       |
| Sf-CYP117ko-B-R            | <b>GCATGCGATGCCAGCCAGCAG</b><br>CGCGCCGTTTCGGCGGTGT               | Reverse primer to amplify ~1kb region upstream of CYP117 (AB fragment); contains overlap region for annealing/fusing to CD fragment               |
| Sf-CYP117ko-C-F            | <b>AAACGGCGCGCTGCTGGCTGG</b><br>CATCGCATGCCCGTGTGG                | Forward primer to amplify a ~1kb region downstream of CYP117 (CD fragment); contains overlap region for annealing/fusing to AB fragment           |
| Sf-CYP117ko-D-R            | TAAT <b>AAGCTT</b> AGGTCGTCGTGG<br>ACCAGGGTACAAG                  | Reverse primer to amplify ~1kb region downstream of CYP117 (CD fragment); contains HindIII                                                        |
| Sf-CYP117ko-check-F        | CGTCAACATGTCGTCGTGCCAG<br>GG                                      | Forward primer ~400bp upstream to check for presence or deletion of CYP117; wild-type fragment=2.1 kb, knockout=0.8 kb                            |
| Sf-CYP117ko-check-R        | CCAGTGCTCCAGCAGCCAGACA<br>GAGC                                    | Reverse primer ~400 bp downstream to check for presence or deletion of CYP117; wild-type fragment=2.1 kb, knockout=0.8 kb                         |
| Sf-CYP114ko-A-F            | ATA <b>GGATCC</b> CCATCCCTGGTG<br>GACAAGGCGGTGG                   | Forward primer to amplify ~400bp region upstream of CYP117 (AB fragment); contains 5' BamHI                                                       |
| Sf-CYP114ko-B-R            | <b>CCTTTTCATGCGGTTCCACCAGA</b><br>GCACCGGGAACCTCCTCGA             | Reverse primer to amplify ~400bp region upstream of CYP114 (AB fragment); contains overlap region for annealing/fusing to CD fragment             |
| Sf-CYP114ko-C-F            | <b>TCCCGGTGCTCTGGTGAACCGC</b><br>ATGAAAAGGGTACAAGGG               | Forward primer to amplify a ~500bp region downstream of CYP114 (CD fragment); contains overlap region for annealing/fusing to AB fragment         |
| Sf-CYP114ko-D-R            | TAAT <b>AAGCTT</b> GCCAGCGCATTG<br>CCCGCTTCGGCCG                  | Reverse primer to amplify ~500bp region downstream of CYP117 (CD fragment); contains HindIII                                                      |
| Sf-CYP114ko-check-F        | GACGGCATCATGCGCTATCCGA<br>GG                                      | Forward primer ~400bp upstream to check for presence or deletion of CYP114; wild-type fragment=2.2 kb, knockout=0.8 kb                            |
| Sf-CYP114ko-check-R        | TCAAACCGTTCCATCGTGCCTC<br>CTGG                                    | Reverse primer ~400bp downstream to check for presence or deletion of CYP114; wild-type fragment=2.2 kb, knockout=0.8 kb                          |
| Sf-Fd <sub>GA</sub> ko-A-F | CATG <b>GAATTC</b> ACCTGCATCGGC<br>AATTCGCGCTGGC                  | Forward primer to amplify ~1kb region upstream of Fd <sub>GA</sub> (AB fragment); contains 5' EcoRI                                               |
| Sf-Fd <sub>GA</sub> ko-B-R | <b>ACCTTGCCCTTCAAACCGTTCCA</b><br>TCTCAGCCCTTGACCCTTTTCA<br>TGCGG | Reverse primer to amplify ~1kb region upstream of Fd <sub>GA</sub> (AB fragment); contains overlap region for annealing/fusing to CD fragment     |
| Sf-Fd <sub>GA</sub> ko-C-F | <b>ATGAAAAGGGTACAAGGGCTG</b><br>AGATGGAACGGTTTGAAGGCAA<br>GGTGGCC | Forward primer to amplify a ~1kb region downstream of Fd <sub>GA</sub> (CD fragment); contains overlap region for annealing/fusing to AB fragment |



|                                 |                                                                    |                                                                                                                                                    |
|---------------------------------|--------------------------------------------------------------------|----------------------------------------------------------------------------------------------------------------------------------------------------|
| Sf-Fd <sub>GA</sub> ko-D-R      | CATG <b>AAGCTT</b> AGTGGCTGCCA<br>CGGTCCGTTCCGC                    | Reverse primer to amplify ~1kb region downstream of Fd <sub>GA</sub> (CD fragment); contains HindIII                                               |
| Sf-Fd <sub>GA</sub> ko-check-F  | TAGCTTCGGCCACGGCATCCAC<br>TTCTG                                    | Forward primer ~300bp upstream to check for presence or deletion of Fd <sub>GA</sub> ; wild-type fragment=0.9 kb, knockout=0.6 kb                  |
| Sf-Fd <sub>GA</sub> ko-check-R  | CCGAAGTGCCGCTCCGCCGTCT<br>CGAA                                     | Reverse primer ~300bp downstream to check for presence or deletion of Fd <sub>GA</sub> ; wild-type fragment=0.9 kb, knockout=0.6 kb                |
| Sf-SDR <sub>GA</sub> ko-A-F     | CATG <b>GAATT</b> CCACGCTATCGGA<br>TGCGGAGTTGATCAGC                | Forward primer to amplify ~1kb region upstream of SDR <sub>GA</sub> (AB fragment); contains 5' EcoRI                                               |
| Sf-SDR <sub>GA</sub> ko-B-R     | <b>TAGGGGTTGAGCAGCAGCTTC</b><br>ACGTGTCCTCCTGGAATGCGTT<br>GGTCTTTC | Reverse primer to amplify ~1kb region upstream of SDR <sub>GA</sub> (AB fragment); contains overlap region for annealing/fusing to CD fragment     |
| Sf-SDR <sub>GA</sub> ko-C-F     | <b>CCAACGCATTCCAGGAGGACA</b><br>CGTGAACGTGCTGCTCAACCCC<br>CTAAACCG | Forward primer to amplify a ~1kb region downstream of SDR <sub>GA</sub> (CD fragment); contains overlap region for annealing/fusing to AB fragment |
| Sf-SDR <sub>GA</sub> ko-D-R     | CATG <b>AAGCTT</b> ACAGATGGGTGC<br>CCGCCGGAATGCGC                  | Reverse primer to amplify ~1kb region downstream of SDR <sub>GA</sub> (CD fragment); contains HindIII                                              |
| Sf-SDR <sub>GA</sub> ko-check-F | CGTCGTGATTGACCAAGATCTG<br>TGCGG                                    | Forward primer ~400bp upstream to check for presence or deletion of SDR <sub>GA</sub> ; wild-type fragment=1.6 kb, knockout=0.75 kb                |
| Sf-SDR <sub>GA</sub> ko-check-R | CGCCGGTTTCGGGCAGGATGGT<br>TAGCT                                    | Reverse primer ~400bp downstream to check for presence or deletion of SDR <sub>GA</sub> ; wild-type fragment=1.6 kb, knockout=0.75 kb              |
| Sf-CYP112ko-A-F                 | ATA <b>AGGATCCC</b> ACGCACAATT<br>CCGCAACGGTGC                     | Forward primer to amplify ~500bp region upstream of CYP112 (AB fragment); contains 5' BamHI                                                        |
| Sf-CYP112ko-B-R                 | <b>GGCGGCTCCGCGCA</b> AGGTGGC<br>ACTCCACTCTCTAAGCGAT               | Reverse primer to amplify ~500bp region upstream of CYP112 (AB fragment); contains overlap region for annealing/fusing to CD fragment              |
| Sf-CYP112ko-C-F                 | <b>GTGGAGTGCCACCT</b> TGCGCGGA<br>CGCCGCCGGGAATCGC                 | Forward primer to amplify a ~500bp region downstream of CYP112 (CD fragment); contains overlap region for annealing/fusing to AB fragment          |
| Sf-CYP112ko-D-R                 | TAAT <b>AAGCTT</b> CATGCCGTCCAG<br>GCGCGCTGCGACG                   | Reverse primer to amplify ~500bp region downstream of CYP112 (CD fragment); contains HindIII                                                       |
| Sf-CYP112ko-check-R             | CCTGTCGTGCGCAAATTCGTTT<br>GAGC                                     | Forward primer ~400bp upstream to check for presence or deletion of CYP112; wild-type fragment=2.0 kb, knockout=0.8 kb                             |
| Sf-CYP112ko-check-F             | GCAGACGCGTATGCGTGGTGG<br>TTCC                                      | Reverse primer ~400bp downstream to check for presence or deletion of CYP112; wild-type fragment=2.0 kb, knockout=0.8 kb                           |
| sacB-F                          | GTGCGTAACTAACTTGCCATCTT<br>C                                       | Forward primer to amplify a portion of the sacB gene for confirmation of pK19 <i>mobsacB</i> knockout construct integration into the host genome   |
| sacB-R                          | CCGAAGCCCAACCTTTCATAGA<br>AG                                       | Reverse primer to amplify a portion of the sacB gene for confirmation of pK19 <i>mobsacB</i> knockout construct integration into the host genome   |

**Supplementary Table 9.** List of genes characterized in this study. Provided are the NCBI/GenBank gene symbols, gene description, gene ID's, locus tags, and UniProtKB identifiers.

|                                                | gene symbol       | gene description | gene ID                                  | locus tag | UniProtKB identifier |                         |
|------------------------------------------------|-------------------|------------------|------------------------------------------|-----------|----------------------|-------------------------|
| <b><i>Bradyrhizobium japonicum</i> USDA110</b> |                   |                  |                                          |           |                      |                         |
|                                                | CYP112            | cyp112           | cytochrome P-450 BJ-1                    | 1055403   | blr2144              | Q59203<br>(CPXP_BRADU)  |
|                                                | CYP114            | cyp114           | cytochrome P-450 BJ-3                    | 1055406   | blr2145              | Q59204<br>(CPXR_BRADU)  |
|                                                | Fd <sub>GA</sub>  | not annotated    | P450-system 3Fe-4S<br>ferredoxin         | -         | blr2145.1            | Q45218<br>(FE45_BRADU)  |
|                                                | SDR <sub>GA</sub> | blr2146          | dehydrogenase                            | 1055404   | blr2146              | Q45219<br>(Y2146_BRADU) |
|                                                | CYP117            | cyp117           | cytochrome P-450 BJ-4                    | 1055402   | blr2147              | Q59205<br>(CPXU_BRADU)  |
| <b><i>Sinorhizobium fredii</i> NGR234</b>      |                   |                  |                                          |           |                      |                         |
|                                                | CYP112            | cpxP             | cytochrome P450 protein<br>CpxP          | 962601    | NGR_a02700           | P55544<br>(CPXP_RHISN)  |
|                                                | CYP114            | cpxR             | cytochrome P450 protein<br>CpxR          | 962600    | NGR_a02710           | P55543<br>(CPXR_RHISN)  |
|                                                | Fd <sub>GA</sub>  | NGR_a02720       | P450-system 3Fe-4S<br>ferredoxin protein | 962355    | NGR_a02720           | P55542<br>(FE45_RHISN)  |
|                                                | SDR <sub>GA</sub> | NGR_a02730       | short chain<br>dehydrogenase/reductase   | 962611    | NGR_a02730           | P55541<br>(Y4LA_RHISN)  |
|                                                | CYP117            | cpxU             | cytochrome P450                          | 962613    | NGR_a02740           | P55540<br>(CPXU_RHISN)  |
